# Supplementary material for: Dual Transcriptomic Analyses Unveil Host–Pathogen Interactions Between Salmonella enterica Serovar Enteritidis and Laying Ducks (Anas platyrhynchos)
Source: Front Microbiol. 2021 Aug 5;12:705712. doi: 10.3389/fmicb.2021.705712 (PMC8374152; doi:10.3389/fmicb.2021.705712)
Supplement: Supplementary Table 4 — Reads aligning to the SE and duck reference. [file Table_4.XLSX]

## Sheet: all.align.stat
Table S4 Reads aligning to the SE and duck reference
Sample	Total Reads	Mapped Reads host	Mapped Reads bacteria	Mapping Ratio host	Mapping Ratio bacteria
T_0h-1	65738392	0	65738392	0	1
T_0h-2	64841802	0	64841802	0	1
T_0h-3	68540462	0	68540462	0	1
T_3h-1	96427714	23836792	72590922	0.2472	0.7528
T_3h-2	68343142	17651973	50691169	0.2583	0.7417
T_3h-3	80275582	19560195	60715387	0.2437	0.7563
T_6h-1	94116970	36662225	57454745	0.3895	0.6105
T_6h-2	84636094	35404279	49231815	0.4183	0.5817
T_6h-3	95186560	36300594	58885966	0.3814	0.6186
T_9h-1	69222116	21583562	47638554	0.3118	0.6882
T_9h-2	79766042	24011704	55754338	0.301	0.699
T_9h-3	75754800	22817291	52937509	0.3012	0.6988
