# Supplementary material for: Dual Transcriptomic Analyses Unveil Host–Pathogen Interactions Between Salmonella enterica Serovar Enteritidis and Laying Ducks (Anas platyrhynchos)
Source: Front Microbiol. 2021 Aug 5;12:705712. doi: 10.3389/fmicb.2021.705712 (PMC8374152; doi:10.3389/fmicb.2021.705712)
Supplement: Supplementary Table 6 — Analysis of SE differentially expressed mRNAs between 3, 6, and 9 h post-infection. [file Table_6.XLSX]

## Sheet: T_3h-vs-T_6h.genes.filter.annot
Table S6. Analysis of differentially expressed mRNAs between 3, 6, and 9 hours
Differentially expressed mRNAs between T_3h and T_6h
id	T_3h_count	T_6h_count	T_3h_fpkm	T_6h_fpkm	log2(FC)	Pvalue	FDR	significant	Symbol	Description	KEGG_A_class	KEGG_B_class	Pathway	K_ID	GO Component	GO Function	GO Process
gene10	56	28	773.747	1584.88	1.03444	9.74866e-05	0.01725	yes	SEN_RS00060	molecular chaperone DnaK [Salmonella enterica]	Genetic Information Processing	Folding, sorting and degradation	ko03018//RNA degradation	K04043	-	-	-
gene1141	104.333	9	1789.76	642.66	-1.47764	1.75286e-05	0.00491093	yes	SEN_RS05440	flagellin [Salmonella enterica]	Cellular Processes;Environmental Information Processing	Signal transduction;Cell motility	ko02020//Two-component system;ko02040//Flagellar assembly	K02406	-	-	-
gene1378	2	5.33333	34.7433	394.58	3.50551	0.000358652	0.0463765	yes	SEN_RS06595	nitrate reductase subunit beta [Salmonella enterica]	Environmental Information Processing;Metabolism	Global and Overview;Signal transduction;Energy metabolism	ko01120//Microbial metabolism in diverse environments;ko02020//Two-component system;ko00910//Nitrogen metabolism	K00371	-	-	-
gene1853	207.667	25.3333	2301.04	1116.28	-1.04358	1.29963e-07	7.25732e-05	yes	SEN_RS08845	phenylalanine--tRNA ligase subunit beta [Salmonella enterica]	Genetic Information Processing	Translation	ko00970//Aminoacyl-tRNA biosynthesis	K01890	-	-	-
gene1944	14.6667	0	438.237	0.001	-18.7414	0.00033397	0.0449123	yes	SEN_RS09250	transcriptional regulator [Salmonella enterica]	-	-	-	-	-	-	-
gene1959	78.3333	58.6667	4449.61	12600.3	1.5017	1.72691e-07	7.25732e-05	yes	SEN_RS09330	heat-shock protein [Salmonella enterica]	-	-	-	-	-	-	-
gene1964	1797.67	151.667	85165	29159.4	-1.5463	7.50353e-66	2.52269e-62	yes	SEN_RS09370	membrane protein pagC [Salmonella enterica]	Environmental Information Processing	Signal transduction	ko02020//Two-component system	K07804	-	-	-
gene1968	73.3333	5.66667	3696.77	1077.45	-1.77864	6.28984e-06	0.00211465	yes	SEN_RS09395	lipoprotein [Salmonella enterica]	-	-	-	-	-	-	-
gene1998	29	23.3333	3023	8989.4	1.57224	0.000173709	0.02781	yes	SEN_RS09540	Multiple stress resistance protein BhsA [Salmonella enterica subsp. enterica serovar Typhi str. P-stx-12] [Salmonella enterica]	-	-	-	-	-	-	-
gene2018	34	29.3333	987.35	3431.72	1.7973	2.52755e-05	0.00606973	yes	SEN_RS09640	malonyl CoA-acyl carrier protein transacylase [Salmonella enterica]	Metabolism	Lipid metabolism;Global and Overview	ko01100//Metabolic pathways;ko01212//Fatty acid metabolism;ko00061//Fatty acid biosynthesis	K00645	-	-	-
gene2487	366.333	228.667	9584.2	24086.7	1.3295	2.85991e-11	3.20501e-08	yes	SEN_RS11805	deubiquitinase [Salmonella enterica subsp. enterica serovar Gallinarum str. SG9] [Salmonella enterica]	-	-	-	-	-	-	-
gene2706	6.66667	11.6667	163.103	1023.62	2.64982	4.01972e-06	0.00150159	yes	SEN_RS12865	glycerate kinase [Salmonella enterica]	Metabolism	Global and Overview;Amino acid metabolism;Carbohydrate metabolism;Lipid metabolism	ko01100//Metabolic pathways;ko01120//Microbial metabolism in diverse environments;ko01130//Biosynthesis of antibiotics;ko00260//Glycine, serine and threonine metabolism;ko00630//Glyoxylate and dicarboxylate metabolism;ko00561//Glycerolipid metabolism	K00865	-	-	-
gene2778	38.3333	33.6667	873.43	3041.51	1.80002	8.87205e-06	0.00271162	yes	SEN_RS13190	flavohemoprotein [Salmonella enterica]	-	-	-	-	-	-	-
gene289	23	16	226.583	599.18	1.40295	0.000230972	0.0337621	yes	SEN_RS01400	type IV secretion protein Rhs [Salmonella enterica]	-	-	-	-	-	-	-
gene3008	42	1.66667	2435.2	375.337	-2.69778	2.75731e-05	0.00618006	yes	SEN_RS14275	invasion lipoprotein InvH [Salmonella enterica]	-	-	-	-	-	-	-
gene3254	9	9.66667	184.947	848.253	2.19739	7.77234e-05	0.0153709	yes	SEN_RS15405	acetyl-CoA hydrolase [Salmonella enterica]	Metabolism	Carbohydrate metabolism	ko00660//C5-Branched dibasic acid metabolism	K18288	-	-	-
gene4040	9	10.3333	251.627	1086.1	2.1098	0.000182753	0.0279279	yes	SEN_RS19155	asparagine synthetase A [Salmonella enterica]	Metabolism	Global and Overview;Metabolism of other amino acids;Amino acid metabolism	ko01100//Metabolic pathways;ko01110//Biosynthesis of secondary metabolites;ko01230//Biosynthesis of amino acids;ko00250//Alanine, aspartate and glutamate metabolism;ko00460//Cyanoamino acid metabolism	K01914	-	-	-
gene4560	5.66667	9.66667	233.157	1499.91	2.6855	7.23472e-08	4.86463e-05	yes	SEN_RS21695	iron-sulfur cluster repair protein YtfE [Salmonella enterica]	-	-	-	-	-	-	-
gene4703	64	4.66667	724.317	203.023	-1.83498	0.000125668	0.0211249	yes	SEN_RS22380	phosphoglycerol transferase I [Salmonella enterica]	-	-	-	-	-	-	-
gene4758	167	16	6110.8	2349.19	-1.3792	1.71629e-07	7.25732e-05	yes	SEN_RS22645	DNA-binding response regulator [Salmonella enterica]	Environmental Information Processing	Signal transduction	ko02020//Two-component system	K07773	-	-	-
gene616	18	18.6667	886.05	3441.32	1.9575	4.55535e-05	0.00957194	yes	SEN_RS02950	alkyl hydroperoxide reductase c22 protein [Salmonella enterica subsp. enterica serovar Typhi str. CT18] [Salmonella enterica]	-	-	-	-	-	GO:0003824//catalytic activity;GO:0016209//antioxidant activity	GO:0008152//metabolic process;GO:0050896//response to stimulus;GO:0044699//single-organism process;GO:0044710//single-organism metabolic process;GO:0006950//response to stress
gene617	6	8.33333	99.48	499.883	2.32911	0.0002791	0.0390973	yes	SEN_RS02955	alkyl hydroperoxide reductase, F subunit [Salmonella enterica subsp. enterica serovar Enteritidis str. 08-1080] [Salmonella enterica]	-	-	-	-	-	-	-
gene863	8.66667	18.6667	258.373	2448.36	3.24429	2.27399e-08	1.91129e-05	yes	SEN_RS04135	electron transfer flavoprotein subunit beta [Salmonella enterica]	-	-	-	-	-	-	-

## Sheet: T_3h-vs-T_9h.genes.filter.annot
Differentially expressed mRNAs between T_3h and T_9h
id	T_3h_count	T_9h_count	T_3h_fpkm	T_9h_fpkm	log2(FC)	Pvalue	FDR	significant	Symbol	Description	KEGG_A_class	KEGG_B_class	Pathway	K_ID	GO Component	GO Function	GO Process
gene1001	0	4	0.001	210.26	17.6818	0.000531956	0.0113244	yes	SEN_RS04780	MOSC domain protein [Salmonella enterica subsp. enterica serovar Kentucky str. CVM29188] [Salmonella enterica]	-	-	-	-	-	-	-
gene1002	1	4.33333	12.6767	113.743	3.16553	0.00177011	0.0299348	yes	SEN_RS04785	ribosomal RNA large subunit methyltransferase K/L [Salmonella enterica]	-	-	-	-	-	-	-
gene1026	23.3333	30.6667	954.513	2049.65	1.10254	0.00194553	0.0317182	yes	SEN_RS04905	BAX inhibitor protein [Salmonella enterica]	-	-	-	-	-	-	-
gene1029	374	48.3333	11218.8	2528.49	-2.14957	8.48764e-13	1.27987e-10	yes	SEN_RS04920	effector protein PipB [Salmonella enterica]	-	-	-	-	-	-	-
gene1035	59.6667	2.66667	1052.63	122.473	-3.10346	2.20551e-08	1.4781e-06	yes	SEN_RS04955	peptidase [Salmonella enterica]	-	-	-	-	-	-	-
gene1064	17.6667	0.333333	773.067	15.9567	-5.59836	4.70579e-05	0.00139592	yes	SEN_RS05080	NAD(P)H dehydrogenase (quinone) [Salmonella enterica]	Metabolism	Global and Overview;Metabolism of cofactors and vitamins	ko01110//Biosynthesis of secondary metabolites;ko00130//Ubiquinone and other terpenoid-quinone biosynthesis	K03809	-	-	-
gene1079	1.33333	7.33333	46.9867	452.223	3.26671	0.00347145	0.0498538	yes	SEN_RS05140	membrane protein [Salmonella enterica]	-	-	-	-	-	-	-
gene1096	0	4.33333	0.001	447.61	18.7719	0.00211726	0.0339042	yes	SEN_RS05225	Sel1 domain-containing protein repeat-containing protein, partial [Salmonella enterica subsp. enterica serovar Enteritidis str. 436] [Salmonella enterica]	-	-	-	-	-	-	-
gene116	14.6667	0.333333	629.233	15.7167	-5.32323	0.000102457	0.00278792	yes	SEN_RS00570	isopropylmalate isomerase small subunit, partial [Salmonella enterica subsp. enterica serovar Enteritidis str. 6.0562-1] [Salmonella enterica]	Metabolism	Amino acid metabolism;Global and Overview;Carbohydrate metabolism	ko01100//Metabolic pathways;ko01110//Biosynthesis of secondary metabolites;ko01230//Biosynthesis of amino acids;ko01210//2-Oxocarboxylic acid metabolism;ko00290//Valine, leucine and isoleucine biosynthesis;ko00660//C5-Branched dibasic acid metabolism	K01704	-	-	-
gene1192	8	12	273.93	745.17	1.44376	0.0024439	0.0379591	yes	SEN_RS05695	copper homeostasis protein CutC [Salmonella enterica]	-	-	-	-	-	-	-
gene1199	7	17.6667	108.163	568.907	2.39498	0.000218808	0.00524416	yes	SEN_RS05725	aspartate--tRNA ligase [Salmonella enterica]	Genetic Information Processing	Translation	ko00970//Aminoacyl-tRNA biosynthesis	K01876	-	-	-
gene1205	0.666667	5	26.6	478.05	4.16766	0.00281014	0.0418685	yes	SEN_RS05755	Holliday junction DNA helicase RuvA, partial [Salmonella enterica subsp. enterica serovar Enteritidis str. SE30663] [Salmonella enterica]	Genetic Information Processing	Replication and repair	ko03440//Homologous recombination	K03550	-	-	-
gene1208	2	6.66667	70.7267	510.517	2.85163	0.000115616	0.00306383	yes	SEN_RS05770	Mn2+/Zn2+ABC transporter ATP-binding protein [Salmonella enterica]	Environmental Information Processing	Membrane transport	ko02010//ABC transporters	K09817	-	-	-
gene1212	4.66667	11	122.01	562.183	2.20404	0.000318759	0.0073477	yes	SEN_RS05785	lauroyl-Kdo(2)-lipid IV(A) myristoyltransferase [Salmonella enterica]	Metabolism	Glycan biosynthesis and metabolism;Global and Overview	ko01100//Metabolic pathways;ko00540//Lipopolysaccharide biosynthesis	K02560	-	-	-
gene1220	4.66667	22	423.44	4206.55	3.31241	9.51932e-12	1.14835e-09	yes	SEN_RS05820	DNA damage-inducible protein [Salmonella enterica]	-	-	-	-	-	-	-
gene1222	6	15.3333	229.023	1205.19	2.39569	4.00225e-07	2.04002e-05	yes	SEN_RS05830	protein YebE [Salmonella enterica]	-	-	-	-	-	-	-
gene1223	2.33333	21	33.4067	497.847	3.89749	9.9903e-11	9.77159e-09	yes	SEN_RS05835	oligopeptidase B [Salmonella enterica]	-	-	-	-	-	-	-
gene1232	14.3333	1.33333	360.527	35.28	-3.35318	0.000117499	0.00306383	yes	SEN_RS05875	integrase [Salmonella enterica]	-	-	-	-	-	-	-
gene1248	398.333	45.3333	19780.9	3987.16	-2.31068	2.71166e-26	9.8135e-24	yes	SEN_RS05960	Superoxide dismutase [Cu-Zn] 1 [Salmonella enterica]	-	-	-	-	-	-	-
gene1268	52	5	5127.23	658.743	-2.96039	9.42456e-05	0.00260362	yes	SEN_RS23130	phage encoded protein PagM [Salmonella enterica subsp. enterica serovar Newport str. WA_14881] [Salmonella enterica]	-	-	-	-	-	-	-
gene1270	88.3333	9.33333	3714.59	711.727	-2.38381	2.40165e-08	1.55193e-06	yes	SEN_RS06075	disulfide bond formation protein B [Salmonella enterica]	-	-	-	-	-	-	-
gene1272	160.333	31	4605.47	1328.56	-1.79348	5.2829e-05	0.00155437	yes	SEN_RS06085	protein PagO [Salmonella enterica]	Environmental Information Processing	Signal transduction	ko02020//Two-component system	K07790	-	-	-
gene1286	8.66667	10.6667	920.447	2478.76	1.42921	0.00179486	0.0300723	yes	SEN_RS06150	Protein of uncharacterised function (DUF1480) [Salmonella enterica subsp. enterica serovar Typhimurium str. DT104] [Salmonella enterica]	-	-	-	-	-	-	-
gene1291	11.3333	20	429.817	1663.18	1.95215	8.84771e-06	0.000323433	yes	SEN_RS06175	RNA chaperone ProQ [Salmonella enterica]	-	-	-	-	-	-	-
gene1308	14	0	395.81	0.001	-18.5944	7.16136e-07	3.40908e-05	yes	SEN_RS06255	PTS mannose transporter subunit EIIAB [Salmonella enterica]	Metabolism;Environmental Information Processing	Membrane transport;Global and Overview;Carbohydrate metabolism	ko01100//Metabolic pathways;ko00520//Amino sugar and nucleotide sugar metabolism;ko02060//Phosphotransferase system (PTS);ko00051//Fructose and mannose metabolism	K02793	-	-	-
gene1335	18.3333	1.66667	314.693	48.99	-2.68339	0.000163949	0.00412034	yes	SEN_RS06385	SpoVR family protein [Salmonella enterica]	-	-	-	-	-	-	-
gene1344	2	6.66667	38.3067	271.573	2.82567	0.000163802	0.00412034	yes	SEN_RS06430	glutamate dehydrogenase [Salmonella enterica]	Metabolism	Energy metabolism;Metabolism of other amino acids;Global and Overview;Amino acid metabolism	ko01100//Metabolic pathways;ko01200//Carbon metabolism;ko00250//Alanine, aspartate and glutamate metabolism;ko00910//Nitrogen metabolism;ko00220//Arginine biosynthesis;ko00471//D-Glutamine and D-glutamate metabolism	K00261	-	-	-
gene1356	3.33333	8	78.7867	472.223	2.58345	0.000454071	0.0100815	yes	SEN_RS06490	GTP-binding protein YchF [Salmonella enterica]	-	-	-	-	-	-	-
gene1363	4.66667	8	94.3467	478.223	2.34164	0.00184295	0.0305947	yes	SEN_RS06525	glutamyl-tRNA reductase [Salmonella enterica]	Metabolism	Metabolism of cofactors and vitamins;Global and Overview	ko01100//Metabolic pathways;ko01110//Biosynthesis of secondary metabolites;ko01120//Microbial metabolism in diverse environments;ko00860//Porphyrin and chlorophyll metabolism	K02492	-	-	-
gene1377	6	0.333333	42.8467	2.54333	-4.07439	0.00252182	0.0388361	yes	SEN_RS06590	nitrate reductase subunit alpha [Salmonella enterica]	Environmental Information Processing;Metabolism	Signal transduction;Energy metabolism;Global and Overview	ko01120//Microbial metabolism in diverse environments;ko02020//Two-component system;ko00910//Nitrogen metabolism	K00370	-	-	-
gene1395	554.667	151.333	35412.6	17586.3	-1.00981	3.16278e-10	2.93489e-08	yes	SEN_RS06655	DNA-binding protein [Salmonella enterica subsp. enterica serovar Typhi str. CT18] [Salmonella enterica]	-	-	-	-	-	-	-
gene1397	29.6667	4.66667	297.203	69.1533	-2.10358	2.22567e-05	0.000719171	yes	SEN_RS06665	bifunctional acetaldehyde-CoA/alcohol dehydrogenase [Salmonella enterica]	Metabolism	Amino acid metabolism;Global and Overview;Xenobiotics biodegradation and metabolism;Lipid metabolism;Carbohydrate metabolism	ko01100//Metabolic pathways;ko01110//Biosynthesis of secondary metabolites;ko01120//Microbial metabolism in diverse environments;ko01130//Biosynthesis of antibiotics;ko00620//Pyruvate metabolism;ko00010//Glycolysis / Gluconeogenesis;ko00650//Butanoate metabolism;ko00350//Tyrosine metabolism;ko00071//Fatty acid degradation;ko01220//Degradation of aromatic compounds;ko00625//Chloroalkane and chloro…	K04072	-	-	-
gene1454	220	11.6667	4284.05	438.25	-3.28915	4.43898e-25	1.33872e-22	yes	SEN_RS06925	Secreted effector kinase SteC [Salmonella enterica subsp. enterica serovar Enteritidis str. EC20121180] [Salmonella enterica]	-	-	-	-	-	-	-
gene1464	14.3333	20.3333	1017.32	3301.95	1.69854	3.1991e-05	0.00100674	yes	SEN_RS06975	DNA-binding transcriptional activator PspC, partial [Salmonella enterica subsp. enterica serovar Urbana str. ATCC 9261] [Salmonella enterica]	-	-	-	-	-	-	-
gene1467	7.66667	20.6667	148.183	886.1	2.58009	9.237e-07	4.07667e-05	yes	SEN_RS06990	YcjX-like family, DUF463 [Salmonella enterica subsp. houtenae str. ATCC BAA-1581] [Salmonella enterica]	-	-	-	-	-	-	-
gene1470	164.667	41.6667	8534.07	3812.13	-1.16264	3.7935e-06	0.000150865	yes	SEN_RS07005	2-Cys peroxiredoxin [Salmonella enterica]	-	-	-	-	-	-	-
gene1480	249.667	34.3333	5886.91	1720.15	-1.77498	1.08914e-08	7.43699e-07	yes	SEN_RS07055	Uncharacterised protein [Salmonella enterica subsp. enterica serovar Typhi] [Salmonella enterica]	-	-	-	-	-	-	-
gene1488	3	6.33333	110.01	445.743	2.01858	0.00284252	0.0421601	yes	SEN_RS07095	B3/4 domain protein [Salmonella enterica subsp. enterica serovar Javiana str. GA_MM04042433] [Salmonella enterica]	-	-	-	-	-	-	-
gene1492	56.3333	11.3333	1619.58	476.937	-1.76375	0.000430718	0.00962203	yes	SEN_RS07115	universal stress protein E [Salmonella enterica]	-	-	-	-	-	-	-
gene1493	49.3333	49	1620.22	3489.83	1.10696	0.000311148	0.00725768	yes	SEN_RS07120	transcriptional regulation of aerobic, anaerobic respiration, osmotic balance (CRP family) [Salmonella enterica subsp. enterica serovar Choleraesuis str. SC-B67] [Salmonella enterica]	-	-	-	-	-	-	-
gene1509	22.3333	36.3333	1279.1	3712.86	1.53741	8.07984e-07	3.60999e-05	yes	SEN_RS07185	transcriptional regulator [Salmonella enterica]	-	-	-	-	-	-	-
gene1525	29	4	1824.86	445.277	-2.03501	3.42587e-05	0.0010507	yes	SEN_RS07265	universal stress protein F [Salmonella enterica]	-	-	-	-	-	-	-
gene154	0	3.33333	0.001	191.96	17.5504	0.00261437	0.0400907	yes	SEN_RS00755	nicotinate-nucleotide pyrophosphorylase [carboxylating] [Salmonella enterica]	Metabolism	Global and Overview;Metabolism of cofactors and vitamins	ko01100//Metabolic pathways;ko00760//Nicotinate and nicotinamide metabolism	K00767	-	-	-
gene1541	20.3333	21.6667	330.817	773.76	1.22585	0.000507317	0.0109939	yes	SEN_RS07345	Dolichyl-phosphate-mannose-protein mannosyltransferase [Salmonella enterica subsp. enterica serovar Enteritidis] [Salmonella enterica]	-	-	-	-	-	-	-
gene1547	274.333	30.6667	5880.61	1177.17	-2.32065	1.41835e-24	3.94846e-22	yes	SEN_RS07375	secreted effector protein SseJ [Salmonella enterica]	-	-	-	-	-	-	-
gene1559	5.66667	14.6667	208.273	1065.67	2.35521	1.22814e-05	0.000431518	yes	SEN_RS07425	GntR family transcriptional regulator [Salmonella enterica]	-	-	-	-	-	-	-
gene1582	60.3333	11	3907.34	1377.14	-1.50452	0.000137623	0.00353232	yes	SEN_RS07540	D-alanyl-D-alanine dipeptidase, partial [Salmonella enterica subsp. enterica serovar Urbana str. ATCC 9261] [Salmonella enterica]	-	-	-	-	-	-	-
gene16	2	11	27.6633	296.573	3.42234	2.86491e-06	0.000118644	yes	SEN_RS00090	chitinase [Salmonella enterica]	-	-	-	-	-	-	-
gene1602	395	51	16675.5	4005.38	-2.05772	2.99931e-22	7.75322e-20	yes	SEN_RS07630	effector protein steA [Salmonella enterica subsp. enterica serovar Enteritidis str. 10-34587] [Salmonella enterica]	-	-	-	-	-	-	-
gene1611	0.666667	15	10.94	487.153	5.47669	2.13775e-12	2.86538e-10	yes	SEN_RS07675	MFS transporter [Salmonella enterica]	-	-	-	-	-	-	-
gene1613	134	9.66667	3157.99	438.697	-2.84771	5.1788e-10	4.4624e-08	yes	SEN_RS07685	outer membrane protein [Salmonella enterica subsp. enterica serovar Enteritidis str. 08-1080] [Salmonella enterica]	-	-	-	-	-	-	-
gene1624	15.6667	1	933.857	66.1467	-3.81946	0.000631046	0.01305	yes	SEN_RS07735	peroxiredoxin [Salmonella enterica]	-	-	-	-	-	-	-
gene1638	217.333	56.3333	5213.32	2533.93	-1.04083	0.000957946	0.0186388	yes	SEN_RS07800	isomerase [Salmonella enterica]	-	-	-	-	-	-	-
gene164	12.3333	28	219.487	1217.22	2.47139	2.03095e-07	1.09702e-05	yes	SEN_RS00800	dihydrolipoyl dehydrogenase [Salmonella enterica subsp. enterica serovar Typhimurium str. LT2] [Salmonella enterica]	Metabolism	Amino acid metabolism;Global and Overview;Carbohydrate metabolism	ko01100//Metabolic pathways;ko01110//Biosynthesis of secondary metabolites;ko01120//Microbial metabolism in diverse environments;ko01130//Biosynthesis of antibiotics;ko01200//Carbon metabolism;ko00620//Pyruvate metabolism;ko00010//Glycolysis / Gluconeogenesis;ko00640//Propanoate metabolism;ko00260//Glycine, serine and threonine metabolism;ko00630//Glyoxylate and dicarboxylate metabolism;ko00020//…	K00382	-	GO:0016723//oxidoreductase activity, oxidizing metal ions, NAD or NADP as acceptor;GO:0046914//transition metal ion binding;GO:0005488//binding;GO:0000166//nucleotide binding;GO:0003824//catalytic activity;GO:1901363//heterocyclic compound binding;GO:0016722//oxidoreductase activity, oxidizing metal ions;GO:0046872//metal ion binding;GO:1901265//nucleoside phosphate binding;GO:0016491//oxidoreduc…	GO:0009636//response to toxic substance;GO:0098754//detoxification;GO:0042592//homeostatic process;GO:0044710//single-organism metabolic process;GO:0008152//metabolic process;GO:0065008//regulation of biological quality;GO:0050896//response to stimulus;GO:0044699//single-organism process;GO:0009987//cellular process;GO:0042221//response to chemical;GO:0065007//biological regulation;GO:0019725//ce…
gene1729	5	9	229.68	898.337	1.96763	0.00105264	0.0199086	yes	SEN_RS08245	Na(+)-translocating NADH-quinone reductase subunit E [Salmonella enterica subsp. enterica serovar Typhi str. CT18] [Salmonella enterica]	-	-	-	-	-	-	-
gene1744	157.667	32	9323.98	3520.82	-1.40503	4.18988e-08	2.61434e-06	yes	SEN_RS08320	MarR family transcriptional regulator [Salmonella enterica]	-	-	-	-	-	-	-
gene1752	2	9.66667	44.4867	446.237	3.32636	8.83097e-06	0.000323433	yes	SEN_RS08360	alkene reductase [Salmonella enterica]	Metabolism	Xenobiotics biodegradation and metabolism;Global and Overview	ko01120//Microbial metabolism in diverse environments;ko00633//Nitrotoluene degradation	K10680	-	-	-
gene1757	79	20	3652.79	1779.62	-1.03743	0.000409707	0.00926706	yes	SEN_RS08385	superoxide dismutase, partial [Salmonella enterica subsp. enterica serovar Heidelberg str. N15757] [Salmonella enterica]	-	-	-	-	-	-	-
gene1767	36.3333	0.666667	866.287	17.99	-5.58958	7.25746e-08	4.23625e-06	yes	SEN_RS08430	EscU/YscU/HrcU family type III secretion system export apparatus switch protein [Salmonella enterica]	Environmental Information Processing	Membrane transport	ko03070//Bacterial secretion system	K03229	-	-	-
gene1770	163	14.6667	6639.29	957.893	-2.79309	4.6104e-14	7.94526e-12	yes	SEN_RS08445	EscR/YscR/HrcR family type III secretion system export apparatus protein [Salmonella enterica]	Environmental Information Processing	Membrane transport	ko03070//Bacterial secretion system	K03226	-	-	-
gene1775	128.667	9	1628.51	266.003	-2.61404	3.3456e-12	4.32419e-10	yes	SEN_RS08470	secretion system apparatus protein SsaV [Salmonella enterica subsp. enterica serovar Newport str. SL317] [Salmonella enterica]	Environmental Information Processing	Membrane transport	ko03070//Bacterial secretion system	K03230	-	-	-
gene1777	91.3333	8.66667	2343.34	396.663	-2.56258	9.03732e-13	1.30824e-10	yes	SEN_RS08480	type III secretion system protein SsaL [Salmonella enterica]	-	-	-	-	-	-	-
gene1778	78	6	2993.41	389.73	-2.94124	1.45496e-11	1.5956e-09	yes	SEN_RS08485	secretion system apparatus protein SsaK [Salmonella enterica]	-	-	-	-	-	-	-
gene1779	47	3.33333	2221.36	218.023	-3.34889	6.30832e-10	5.18859e-08	yes	SEN_RS08490	Type III secretion bridge between inner and outermembrane lipoprotein (YscJ%2CHrcJ%2CEscJ%2C PscJ) [Salmonella enterica subsp. enterica serovar Typhimurium str. DT104] [Salmonella enterica]	-	-	-	-	-	-	-
gene1780	334.333	19	11691.6	1200.39	-3.2839	2.15501e-31	1.55979e-28	yes	SEN_RS08495	type III secretion system lipoprotein SsaJ [Salmonella enterica]	Environmental Information Processing	Membrane transport	ko03070//Bacterial secretion system	K03222	-	-	-
gene1781	6	0.333333	644.213	38.2533	-4.07388	0.00117839	0.0216478	yes	SEN_RS08500	type III secretion system protein SsaI [Salmonella enterica]	-	-	-	-	-	-	-
gene1782	94.6667	7	8485.27	1180.62	-2.84542	4.58232e-15	8.72811e-13	yes	SEN_RS08505	type III secretion system protein SsaH [Salmonella enterica]	-	-	-	-	-	-	-
gene1788	20.3333	1.33333	903.527	64.7967	-3.80158	0.000117677	0.00306383	yes	SEN_RS08535	secreted effector protein SseD [Salmonella enterica]	-	-	-	-	-	-	-
gene1789	368	25.6667	6586.92	749.687	-3.13525	2.06251e-19	4.66514e-17	yes	SEN_RS08540	pathogenicity island 2 effector protein SseC [Salmonella enterica]	-	-	-	-	-	-	-
gene1790	74.6667	5.33333	4198.37	592.153	-2.82579	1.48614e-13	2.33841e-11	yes	SEN_RS08545	type III secretion low calcium response chaperone LcrH/SycD [Salmonella enterica subsp. enterica serovar Schwarzengrund str. CVM19633] [Salmonella enterica]	-	-	-	-	-	-	-
gene1791	463	15.6667	20545.3	1015.91	-4.33797	4.0801e-28	2.46098e-25	yes	SEN_RS08550	secreted effector protein SseB [Salmonella enterica]	-	-	-	-	-	-	-
gene1792	130.333	10.3333	10462.4	1538.08	-2.76601	4.1419e-20	9.99304e-18	yes	SEN_RS08555	type III secretion system chaperone SseA [Salmonella enterica]	-	-	-	-	-	-	-
gene1795	70.3333	3.66667	1495.46	116.703	-3.67967	1.4193e-11	1.5956e-09	yes	SEN_RS08565	type III secretion system protein SsaD [Salmonella enterica]	-	-	-	-	-	-	-
gene1796	209	18	3613.06	434.207	-3.05677	2.19114e-07	1.16614e-05	yes	SEN_RS08570	EscC/YscC/HrcC family type III secretion system outer membrane ring protein [Salmonella enterica]	Environmental Information Processing	Membrane transport	ko03070//Bacterial secretion system	K03219	-	-	-
gene1797	57.6667	10.3333	3819.75	1121.97	-1.76744	1.09281e-06	4.70819e-05	yes	spiC	pathogenicity island chaperone protein SpiC [Salmonella enterica]	-	-	-	-	-	-	-
gene1798	117.667	23.3333	1102.82	397.16	-1.47341	3.5598e-06	0.000143144	yes	SEN_RS08580	hybrid sensor histidine kinase/response regulator [Salmonella enterica]	Environmental Information Processing	Signal transduction	ko02020//Two-component system	K14978	-	-	-
gene1799	181	15.6667	7326.63	1231.09	-2.57321	2.48628e-15	5.29285e-13	yes	SEN_RS08585	DNA-binding response regulator [Salmonella enterica]	Environmental Information Processing	Signal transduction	ko02020//Two-component system	K14979	-	-	-
gene1853	207.667	42.3333	2301.04	964.407	-1.25457	4.9266e-09	3.71445e-07	yes	SEN_RS08845	phenylalanine--tRNA ligase subunit beta [Salmonella enterica]	Genetic Information Processing	Translation	ko00970//Aminoacyl-tRNA biosynthesis	K01890	-	-	-
gene1861	9.33333	16.6667	201.337	745.85	1.88928	4.13235e-05	0.00124625	yes	SEN_RS08880	polymerase [Salmonella enterica]	-	-	-	-	-	-	-
gene1865	62.6667	2.33333	1652.03	126.693	-3.70482	1.21588e-07	6.87541e-06	yes	SEN_RS08900	outer membrane protein [Salmonella enterica]	-	-	-	-	-	-	-
gene1886	7.33333	22.6667	227.553	1213.04	2.41435	3.39632e-05	0.00105054	yes	SEN_RS08995	nucleotide excision repair endonuclease [Salmonella enterica]	-	-	-	-	-	-	-
gene1916	157	38.6667	4204.93	2069.03	-1.02312	2.32516e-06	9.8997e-05	yes	SEN_RS09130	aldehyde dehydrogenase [Salmonella enterica]	Metabolism	Carbohydrate metabolism;Global and Overview	ko01100//Metabolic pathways;ko01110//Biosynthesis of secondary metabolites;ko01120//Microbial metabolism in diverse environments;ko01130//Biosynthesis of antibiotics;ko01230//Biosynthesis of amino acids;ko01200//Carbon metabolism;ko00010//Glycolysis / Gluconeogenesis	K00134	GO:0005623//cell;GO:0005622//intracellular;GO:0044464//cell part;GO:0044424//intracellular part	GO:0003824//catalytic activity;GO:0016491//oxidoreductase activity;GO:0000166//nucleotide binding;GO:0036094//small molecule binding;GO:1901363//heterocyclic compound binding;GO:1901265//nucleoside phosphate binding;GO:0016903//oxidoreductase activity, acting on the aldehyde or oxo group of donors;GO:0005488//binding;GO:0097159//organic cyclic compound binding	GO:0005975//carbohydrate metabolic process;GO:0044237//cellular metabolic process;GO:0009987//cellular process;GO:0044763//single-organism cellular process;GO:0032787//monocarboxylic acid metabolic process;GO:0006090//pyruvate metabolic process;GO:0044710//single-organism metabolic process;GO:0005996//monosaccharide metabolic process;GO:0044238//primary metabolic process;GO:0044723//single-organi…
gene1940	145.667	22	6816.24	1643.84	-2.05191	0.00178968	0.0300723	yes	SEN_RS09240	chorismate mutase [Salmonella enterica]	Metabolism	Global and Overview;Amino acid metabolism	ko01100//Metabolic pathways;ko01110//Biosynthesis of secondary metabolites;ko01130//Biosynthesis of antibiotics;ko01230//Biosynthesis of amino acids;ko00400//Phenylalanine, tyrosine and tryptophan biosynthesis	K04093	-	-	-
gene1964	1797.67	96	85165	8402.27	-3.34141	2.73228e-69	9.88811e-66	yes	SEN_RS09370	membrane protein [Salmonella enterica]	Environmental Information Processing	Signal transduction	ko02020//Two-component system	K07804	-	-	-
gene1968	73.3333	12.3333	3696.77	1014.55	-1.86542	3.0304e-07	1.56672e-05	yes	SEN_RS09395	lipoprotein [Salmonella enterica]	-	-	-	-	-	-	-
gene1998	29	125.667	3023	23293.5	2.94587	7.63772e-27	3.45511e-24	yes	SEN_RS09540	Multiple stress resistance protein BhsA [Salmonella enterica subsp. enterica serovar Typhi str. P-stx-12] [Salmonella enterica]	-	-	-	-	-	-	-
gene2015	39	46	843.227	2071.36	1.29659	3.81854e-05	0.00116129	yes	SEN_RS09625	beta-ketoacyl-[acyl-carrier-protein] synthase II [Salmonella enterica]	Metabolism	Metabolism of cofactors and vitamins;Global and Overview;Lipid metabolism	ko01100//Metabolic pathways;ko01212//Fatty acid metabolism;ko00780//Biotin metabolism;ko00061//Fatty acid biosynthesis	K09458	-	-	-
gene2018	34	92.3333	987.35	5158.52	2.38532	3.01403e-11	3.20817e-09	yes	SEN_RS09640	malonyl CoA-acyl carrier protein transacylase [Salmonella enterica]	Metabolism	Lipid metabolism;Global and Overview	ko01100//Metabolic pathways;ko01212//Fatty acid metabolism;ko00061//Fatty acid biosynthesis	K00645	-	-	-
gene2052	5.66667	21	609.57	3743.02	2.61834	7.03175e-08	4.20984e-06	yes	SEN_RS09805	DNA damage-inducible protein I, inhibits UmuD processing [Salmonella enterica subsp. enterica serovar Choleraesuis str. SC-B67] [Salmonella enterica]	-	-	-	-	-	-	-
gene2091	0.666667	5	25.5267	349.707	3.77607	0.000702962	0.0141334	yes	SEN_RS09970	membrane protein [Salmonella enterica subsp. enterica serovar Pullorum str. S06004] [Salmonella enterica]	-	-	-	-	-	-	-
gene2158	4	12	442.72	1918.28	2.11534	0.000648583	0.0133365	yes	SEN_RS23405	exported protein [Salmonella enterica subsp. enterica serovar Dublin str. CT_02021853] [Salmonella enterica]	-	-	-	-	-	-	-
gene2162	1.33333	5.33333	65.9367	573.42	3.12044	0.00114315	0.0213251	yes	SEN_RS10295	Uncharacterised protein [Salmonella enterica subsp. enterica serovar Pullorum] [Salmonella enterica]	-	-	-	-	-	-	-
gene2169	3.33333	13	94.9567	858.32	3.17617	1.12334e-05	0.000398565	yes	SEN_RS10325	Protein of uncharacterised function (DUF2971) [Salmonella enterica subsp. enterica serovar Pullorum] [Salmonella enterica]	-	-	-	-	-	-	-
gene2181	0	4	0.001	473.6	18.8533	0.00213518	0.0340407	yes	SEN_RS10380	DUF4756 domain-containing protein [Salmonella enterica subsp. enterica serovar Nitra] [Salmonella enterica]	-	-	-	-	-	-	-
gene2183	2.33333	18	124.86	1571.1	3.65339	7.25993e-09	5.36197e-07	yes	SEN_RS10390	membrane protein [Salmonella enterica subsp. enterica serovar Pullorum str. S06004] [Salmonella enterica]	-	-	-	-	-	-	-
gene222	26.3333	42.3333	500.567	1565.77	1.64524	0.000312848	0.00725768	yes	SEN_RS01080	protease Do [Salmonella enterica subsp. enterica serovar Newport str. SL254] [Salmonella enterica]	Environmental Information Processing	Signal transduction	ko02020//Two-component system	K04771	-	-	-
gene225	41	6.66667	2724.79	792.147	-1.7823	0.000304197	0.00714862	yes	SEN_RS01095	UPF0325 protein yaeH [Salmonella enterica subsp. enterica serovar Typhimurium str. ST4/74] [Salmonella enterica]	-	-	-	-	-	-	-
gene2275	163.333	27	3628.16	1278.61	-1.50466	8.9177e-05	0.00250179	yes	SEN_RS10815	UDP-glucose 6-dehydrogenase [Salmonella enterica]	Metabolism	Carbohydrate metabolism;Global and Overview	ko01100//Metabolic pathways;ko00520//Amino sugar and nucleotide sugar metabolism;ko00500//Starch and sucrose metabolism;ko00040//Pentose and glucuronate interconversions;ko00053//Ascorbate and aldarate metabolism	K00012	-	-	-
gene2282	40.3333	48	1029.87	2703.38	1.39231	0.00169552	0.0292194	yes	SEN_RS10845	protein RfbU [Salmonella enterica]	-	-	-	-	-	-	-
gene2283	45	57.6667	1209.9	2976.51	1.29874	1.3175e-05	0.000458464	yes	SEN_RS10850	transferase [Salmonella enterica]	-	-	-	-	-	-	-
gene2284	43.6667	48.3333	890.397	2060.1	1.21019	0.00227489	0.0359512	yes	SEN_RS10855	transporter [Salmonella enterica]	-	-	-	-	-	-	-
gene2287	125.667	28	2499.33	1157.39	-1.11067	0.0016026	0.0281545	yes	SEN_RS10870	LPS biosynthesis protein [Salmonella enterica]	Metabolism	Carbohydrate metabolism	ko00520//Amino sugar and nucleotide sugar metabolism	K12452	-	-	-
gene2355	1.66667	9.66667	103.797	981.183	3.24076	0.00272094	0.0410296	yes	SEN_RS11195	lipoprotein [Salmonella enterica]	-	-	-	-	-	-	-
gene2401	3.33333	11.6667	45.51	227.143	2.31935	0.000378998	0.00868097	yes	SEN_RS11410	catecholate siderophore receptor CirA [Salmonella enterica]	-	-	-	-	-	-	-
gene2425	24.3333	26	1823.07	4127.42	1.17887	0.00038776	0.00882581	yes	SEN_RS11515	YejG-like protein [Salmonella enterica subsp. enterica serovar Typhi] [Salmonella enterica]	-	-	-	-	-	-	-
gene2442	70	8.33333	3227.93	752.463	-2.10091	2.39909e-08	1.55193e-06	yes	SEN_RS11595	outer membrane protein [Salmonella enterica]	-	-	-	-	-	-	-
gene2465	174.667	37	4044.63	1571.84	-1.36356	3.2983e-10	2.98414e-08	yes	SEN_RS11705	phosphoporin PhoE [Salmonella enterica]	Environmental Information Processing	Signal transduction	ko02020//Two-component system	K09475	-	-	-
gene2470	31.3333	32.6667	309.48	752.353	1.28156	0.000479744	0.0105865	yes	SEN_RS11725	DNA gyrase subunit A [Salmonella enterica]	-	-	-	-	-	-	-
gene2474	0.666667	4.66667	18.4	312.863	4.08775	0.00114005	0.0213251	yes	SEN_RS11740	regulatory protein [Salmonella enterica]	-	-	-	-	-	-	-
gene2487	366.333	96.3333	9584.2	4676.08	-1.03536	1.74426e-07	9.56433e-06	yes	SEN_RS11805	deubiquitinase [Salmonella enterica subsp. enterica serovar Gallinarum str. SG9] [Salmonella enterica]	-	-	-	-	-	-	-
gene2498	18	2	465.55	58.08	-3.00282	0.00151042	0.0269504	yes	SEN_RS11855	undecaprenyl-phosphate 4-deoxy-4-formamido-L-arabinose transferase [Salmonella enterica]	Metabolism	Carbohydrate metabolism	ko00520//Amino sugar and nucleotide sugar metabolism	K10012	-	-	-
gene2499	24.3333	1.66667	312.507	36.3433	-3.10412	0.00010351	0.00279554	yes	SEN_RS11860	bifunctional UDP-glucuronic acid oxidase/UDP-4-amino-4-deoxy-L-arabinose formyltransferase [Salmonella enterica]	Metabolism	Carbohydrate metabolism	ko00520//Amino sugar and nucleotide sugar metabolism	K10011	-	-	-
gene2560	1.66667	6.66667	33.8633	237.407	2.80956	0.000179691	0.00439392	yes	SEN_RS12160	amino acid permease [Salmonella enterica]	-	-	-	-	-	-	-
gene2593	8.33333	0.333333	803.357	33.42	-4.58726	0.00264359	0.0403678	yes	SEN_RS12325	UPF0381 protein yfcZ [Salmonella enterica subsp. enterica serovar Choleraesuis str. SCSA50] [Salmonella enterica]	-	-	-	-	-	-	-
gene264	2.66667	9	76.55	497.807	2.70111	0.000913157	0.0178633	yes	SEN_RS01275	methionine import ATP-binding protein MetN 1 [Salmonella enterica]	Environmental Information Processing	Membrane transport	ko02010//ABC transporters	K02071	-	-	-
gene2647	72.6667	12	3706.47	1049.66	-1.82013	7.1254e-07	3.40908e-05	yes	SEN_RS12580	PTS system glucose-specific transporter subunit IIA [Salmonella enterica subsp. enterica serovar Typhi str. CT18] [Salmonella enterica]	Environmental Information Processing;Metabolism	Carbohydrate metabolism;Membrane transport	ko00520//Amino sugar and nucleotide sugar metabolism;ko02060//Phosphotransferase system (PTS);ko00010//Glycolysis / Gluconeogenesis;ko00500//Starch and sucrose metabolism	K02777	-	GO:0016740//transferase activity;GO:0016772//transferase activity, transferring phosphorus-containing groups;GO:0003824//catalytic activity	GO:0044699//single-organism process;GO:0071702//organic substance transport;GO:0044765//single-organism transport;GO:0044237//cellular metabolic process;GO:0051234//establishment of localization;GO:0006796//phosphate-containing compound metabolic process;GO:0051179//localization;GO:0008152//metabolic process;GO:1902578//single-organism localization;GO:0009987//cellular process;GO:0008643//carbohy…
gene2692	5	13.3333	99.3433	410.877	2.04821	0.000685427	0.0139357	yes	SEN_RS12795	penicillin binding protein PBP4B [Salmonella enterica]	-	-	-	-	-	-	-
gene2702	16.6667	21	433.493	1273.19	1.55436	0.00171547	0.0292844	yes	SEN_RS12845	outer membrane protein assembly factor BamC [Salmonella enterica]	-	-	-	-	-	-	-
gene2726	1.33333	7.66667	20.6333	340.083	4.04284	1.56245e-05	0.000523564	yes	SEN_RS12960	GMP synthase (glutamine-hydrolyzing) [Salmonella enterica]	Metabolism	Nucleotide metabolism;Global and Overview	ko01100//Metabolic pathways;ko00230//Purine metabolism	K01951	-	-	-
gene2727	4.66667	11.6667	83.9967	420.867	2.32496	6.5625e-06	0.000247393	yes	SEN_RS12965	inositol-5-monophosphate dehydrogenase [Salmonella enterica subsp. enterica serovar Typhimurium str. 14028S] [Salmonella enterica]	Metabolism	Nucleotide metabolism;Global and Overview	ko01100//Metabolic pathways;ko01110//Biosynthesis of secondary metabolites;ko00230//Purine metabolism	K00088	-	-	-
gene2762	0	6	0.001	533.507	19.0251	0.000216005	0.00521148	yes	hscB	co-chaperone protein HscB [Salmonella enterica]	-	-	-	-	-	-	-
gene2766	8	16.6667	413.387	1696.33	2.03685	1.19917e-07	6.87541e-06	yes	SEN_RS13130	Fe-S cluster assembly transcriptional regulator IscR [Salmonella enterica]	-	-	-	-	-	-	-
gene2768	19.6667	52.3333	646.287	3553.8	2.45912	3.60176e-09	2.77335e-07	yes	SEN_RS13140	inositol monophosphatase [Salmonella enterica]	Metabolism	Carbohydrate metabolism;Global and Overview;Biosynthesis of other secondary metabolites	ko01100//Metabolic pathways;ko00521//Streptomycin biosynthesis;ko00562//Inositol phosphate metabolism	K01092	-	-	-
gene2780	27.3333	2.33333	570.607	98.21	-2.53855	0.000173015	0.00431823	yes	cadB	probable cadaverine/lysine antiporter [Salmonella enterica subsp. enterica serovar Paratyphi C str. RKS4594] [Salmonella enterica]	-	-	-	-	-	-	-
gene2781	21.3333	4	266.61	70.38	-1.92149	0.000994103	0.0191365	yes	SEN_RS13205	lysine decarboxylase inducible [Salmonella enterica]	Metabolism	Global and Overview;Amino acid metabolism	ko01100//Metabolic pathways;ko01110//Biosynthesis of secondary metabolites;ko00310//Lysine degradation	K01582	-	-	-
gene2817	35.6667	0	2671.91	0.001	-21.3494	1.11868e-10	1.0654e-08	yes	SEN_RS13375	autonomous glycyl radical cofactor GrcA [Salmonella enterica subsp. enterica serovar Typhi str. CT18] [Salmonella enterica]	-	-	-	-	-	-	-
gene2835	151.333	7	12362.3	905.3	-3.7714	2.98535e-15	6.0022e-13	yes	SEN_RS13465	translation inhibitor protein RaiA [Salmonella enterica]	-	-	-	-	-	-	-
gene2844	29	34.6667	1403.8	2928.18	1.06067	0.000525423	0.0112515	yes	rimM	16S rRNA processing protein RimM [Salmonella enterica subsp. enterica serovar Adelaide str. A4-669] [Salmonella enterica]	-	-	-	-	-	-	-
gene2853	2.66667	20.6667	39.1867	601.587	3.94034	9.84709e-12	1.14957e-09	yes	SEN_RS13550	DNA repair protein RecN [Salmonella enterica]	-	-	-	-	-	-	-
gene2878	22.6667	4.66667	1759.59	547.26	-1.68494	0.00156585	0.0276429	yes	SEN_RS23660	inner membrane protein [Salmonella enterica subsp. enterica serovar Typhimurium str. DT104] [Salmonella enterica]	-	-	-	-	-	-	-
gene2879	999	111	24643.3	4868.63	-2.33961	1.26729e-12	1.76397e-10	yes	SEN_RS13655	effector protein PipB2 [Salmonella enterica]	-	-	-	-	-	-	-
gene2881	1154.67	206.333	32684.3	10483.8	-1.64043	9.29567e-11	9.34473e-09	yes	SEN_RS13660	VirG localization protein VirK [Salmonella enterica]	-	-	-	-	-	-	-
gene289	23	118	226.583	2074.6	3.19472	2.2211e-26	8.93128e-24	yes	SEN_RS01400	type IV secretion protein Rhs [Salmonella enterica]	-	-	-	-	-	-	-
gene290	0.666667	16.3333	36.42	1816.48	5.64027	4.41293e-07	2.18773e-05	yes	SEN_RS01405	rhs-associated protein [Salmonella enterica subsp. enterica serovar Enteritidis str. P125109] [Salmonella enterica]	-	-	-	-	-	-	-
gene2934	20.3333	116.333	504.61	5827.47	3.52963	9.12983e-38	8.26022e-35	yes	SEN_RS13915	RecA protein [Salmonella enterica subsp. enterica serovar Typhimurium] [Salmonella enterica]	Genetic Information Processing	Replication and repair	ko03440//Homologous recombination	K03553	-	-	-
gene2938	17	0.333333	797.633	16.89	-5.56148	2.70372e-06	0.000113776	yes	srlA	glucitol/sorbitol permease IIC component [Salmonella enterica subsp. enterica serovar Dublin str. UC16] [Salmonella enterica]	Environmental Information Processing;Metabolism	Membrane transport;Carbohydrate metabolism	ko02060//Phosphotransferase system (PTS);ko00051//Fructose and mannose metabolism	K02783	-	-	-
gene2975	61	14	1779.21	784.133	-1.18207	0.000672425	0.0137486	yes	SEN_RS14110	transcriptional regulator [Salmonella enterica]	-	-	-	-	-	-	-
gene3008	42	3.33333	2435.2	338.29	-2.84771	7.62108e-07	3.44759e-05	yes	SEN_RS14275	invasion lipoprotein InvH [Salmonella enterica]	-	-	-	-	-	-	-
gene3011	4.33333	8.33333	222.333	878.947	1.98305	0.00349018	0.0499248	yes	SEN_RS14285	N-acetyltransferase [Salmonella enterica]	-	-	-	-	-	-	-
gene3013	0	68.6667	0.001	5194.46	22.3085	1.7428e-42	3.15359e-39	yes	SEN_RS14295	Serine/threonine-protein phosphatase 2 [Salmonella enterica]	-	-	-	-	-	-	-
gene302	14.3333	35.3333	156.907	766.95	2.28923	1.03673e-08	7.35673e-07	yes	SEN_RS01450	pilin outer membrane usher protein SafC [Salmonella enterica]	-	-	-	-	-	-	-
gene3033	61.6667	78.6667	1668.03	3826.2	1.19776	1.05455e-05	0.000377864	yes	SEN_RS14390	RNA polymerase sigma factor RpoS [Salmonella enterica]	-	-	-	-	-	-	-
gene308	395.667	26.3333	14317	1833.97	-2.96468	2.3388e-27	1.20916e-24	yes	SEN_RS01485	outer membrane protein PagN [Salmonella enterica]	-	-	-	-	-	-	-
gene3105	1.33333	4	27	203.66	2.91513	0.00314191	0.045849	yes	SEN_RS14715	cysteine sulfinate desulfinase [Salmonella enterica]	-	-	-	-	-	-	-
gene315	4.33333	26	102.407	1163.36	3.50592	6.1408e-14	1.01016e-11	yes	SEN_RS01520	DNA polymerase IV [Salmonella enterica]	-	-	-	-	-	-	-
gene3159	11.3333	22.3333	1355.97	4848.04	1.83807	0.00324328	0.0469498	yes	SEN_RS14975	virulence-associated protein VagC [Salmonella enterica subsp. enterica serovar Typhi str. CT18] [Salmonella enterica]	-	-	-	-	-	-	-
gene316	1.66667	8.66667	45.85	321.703	2.81074	0.00118813	0.0217163	yes	SEN_RS01525	release factor H-coupled RctB family protein [Salmonella enterica subsp. enterica serovar Enteritidis str. 2009K0958] [Salmonella enterica]	-	-	-	-	-	-	-
gene3183	6.33333	0	426.247	0.001	-18.7013	0.000992351	0.0191365	yes	SEN_RS15080	glycine cleavage system H protein [Salmonella enterica subsp. enterica serovar Typhi str. CT18] [Salmonella enterica]	Metabolism	Carbohydrate metabolism;Global and Overview;Amino acid metabolism	ko01100//Metabolic pathways;ko01110//Biosynthesis of secondary metabolites;ko01130//Biosynthesis of antibiotics;ko00260//Glycine, serine and threonine metabolism;ko00630//Glyoxylate and dicarboxylate metabolism	K02437	-	-	GO:0006082//organic acid metabolic process;GO:1901564//organonitrogen compound metabolic process;GO:0006546//glycine catabolic process;GO:1901575//organic substance catabolic process;GO:0044699//single-organism process;GO:0008152//metabolic process;GO:0016054//organic acid catabolic process;GO:0044238//primary metabolic process;GO:0043436//oxoacid metabolic process;GO:0009063//cellular amino acid…
gene3213	0	6	0.001	469.82	18.8417	0.0011693	0.0215902	yes	SEN_RS15210	mannitol dehydrogenase [Salmonella enterica]	-	-	-	-	-	-	-
gene3268	23.6667	1	678.087	57.38	-3.56285	7.34756e-07	3.40908e-05	yes	SEN_RS15475	polysaccharide deacetylase domain protein [Salmonella enterica subsp. enterica serovar Dublin str. CT_02021853] [Salmonella enterica]	-	-	-	-	-	GO:0016787//hydrolase activity;GO:0003824//catalytic activity	GO:0005975//carbohydrate metabolic process;GO:0000272//polysaccharide catabolic process;GO:1901575//organic substance catabolic process;GO:0008152//metabolic process;GO:0005976//polysaccharide metabolic process;GO:0016052//carbohydrate catabolic process;GO:0009056//catabolic process;GO:0009057//macromolecule catabolic process;GO:0044238//primary metabolic process;GO:0043170//macromolecule metabol…
gene3269	46.6667	1.33333	1354.46	43.3467	-4.96565	6.51034e-10	5.23576e-08	yes	SEN_RS15480	amidohydrolase [Salmonella enterica]	-	-	-	-	-	-	-
gene3271	7.66667	21.6667	175.567	934.86	2.41273	7.64393e-06	0.000285189	yes	SEN_RS15490	mannonate dehydratase [Salmonella enterica]	Metabolism	Carbohydrate metabolism;Global and Overview	ko01100//Metabolic pathways;ko00040//Pentose and glucuronate interconversions	K01686	-	-	-
gene3292	9	24	457.34	2548.24	2.47816	2.44432e-08	1.55193e-06	yes	SEN_RS15585	RNA helicase [Salmonella enterica]	-	-	-	-	-	-	-
gene3296	1.66667	7.66667	100.98	793.823	2.97475	5.63834e-05	0.00164558	yes	SEN_RS15605	biopolymer transport protein ExbD [Salmonella enterica]	-	-	-	-	-	-	-
gene3297	9.33333	13.3333	341.587	942.193	1.46377	0.0004145	0.00931724	yes	SEN_RS15610	biopolymer transporter ExbB [Salmonella enterica]	-	-	-	-	-	-	-
gene3313	2.66667	6	30.8767	159.693	2.37072	0.00268126	0.040771	yes	SEN_RS15690	DNA topoisomerase IV subunit A [Salmonella enterica]	-	-	-	-	-	-	-
gene3325	23	2.66667	404.063	68.1867	-2.56702	1.5547e-05	0.000523564	yes	SEN_RS15750	outer membrane channel protein TolC [Salmonella enterica]	Environmental Information Processing	Membrane transport;Signal transduction	ko02020//Two-component system;ko03070//Bacterial secretion system	K12340	-	-	-
gene3351	9.33333	22	1162.35	4352.19	1.9047	0.00194569	0.0317182	yes	SEN_RS15870	30S ribosomal protein S21 [Pantoea dispersa EGD-AAK13] [Pantoea dispersa]	Genetic Information Processing	Translation	ko03010//Ribosome	K02970	GO:0032991//macromolecular complex;GO:0044424//intracellular part;GO:0005623//cell;GO:1990904//ribonucleoprotein complex;GO:0005622//intracellular;GO:0044464//cell part;GO:0030529//intracellular ribonucleoprotein complex	-	GO:0043170//macromolecule metabolic process;GO:0071704//organic substance metabolic process;GO:0010467//gene expression;GO:0008152//metabolic process
gene3352	13.3333	27	205.04	695.51	1.76217	3.47054e-06	0.000141122	yes	SEN_RS15875	DNA primase [Salmonella enterica]	Genetic Information Processing	Replication and repair	ko03030//DNA replication	K02316	-	-	-
gene3367	6.66667	19.6667	187.117	977.113	2.38459	1.26841e-07	7.06212e-06	yes	SEN_RS15945	integral membrane protein, TerC family [Salmonella enterica subsp. houtenae str. ATCC BAA-1581] [Salmonella enterica]	-	-	-	-	-	-	-
gene3421	53.3333	78.3333	728.247	2135.04	1.55177	2.35872e-07	1.23713e-05	yes	SEN_RS16195	DEAD/DEAH family ATP-dependent RNA helicase [Salmonella enterica]	Genetic Information Processing	Folding, sorting and degradation	ko03018//RNA degradation	K05592	-	-	-
gene3428	40	43.6667	699.19	1523.08	1.12324	2.63272e-05	0.00084317	yes	nusA	transcription termination protein NusA [Salmonella enterica]	-	-	-	-	-	-	-
gene3437	55	63.6667	743.17	1743.53	1.23024	7.09588e-08	4.20984e-06	yes	hflB	cell division protein FtsH [Salmonella enterica subsp. enterica serovar Typhi str. CT18] [Salmonella enterica]	-	-	-	-	-	-	-
gene3449	1.66667	4.66667	34.1367	176.14	2.36733	0.00183944	0.0305947	yes	SEN_RS16335	UDP-N-acetylglucosamine 1-carboxyvinyltransferase [Salmonella enterica]	Metabolism	Carbohydrate metabolism;Global and Overview;Glycan biosynthesis and metabolism	ko01100//Metabolic pathways;ko00520//Amino sugar and nucleotide sugar metabolism;ko00550//Peptidoglycan biosynthesis	K00790	-	-	-
gene3483	4.66667	0	143.003	0.001	-17.1257	0.000879719	0.0173027	yes	SEN_RS16500	N-acetylneuraminate lyase [Salmonella enterica]	Metabolism	Carbohydrate metabolism	ko00520//Amino sugar and nucleotide sugar metabolism	K01639	-	-	-
gene3503	14.6667	20.3333	401.16	1064.34	1.4077	0.000116938	0.00306383	yes	SEN_RS16600	malate dehydrogenase [Salmonella enterica]	Metabolism	Energy metabolism;Carbohydrate metabolism;Amino acid metabolism;Global and Overview	ko01100//Metabolic pathways;ko01110//Biosynthesis of secondary metabolites;ko01120//Microbial metabolism in diverse environments;ko01130//Biosynthesis of antibiotics;ko01200//Carbon metabolism;ko00620//Pyruvate metabolism;ko00630//Glyoxylate and dicarboxylate metabolism;ko00270//Cysteine and methionine metabolism;ko00680//Methane metabolism;ko00020//Citrate cycle (TCA cycle)	K00024	-	-	-
gene3509	1.33333	5	34.9	290.627	3.05787	0.000861141	0.0170299	yes	SEN_RS16630	p-hydroxybenzoic acid efflux subunit AaeA [Salmonella enterica]	-	-	-	-	-	-	-
gene351	2	7.33333	83.2867	687.957	3.04616	0.000296671	0.00701734	yes	SEN_RS01690	transcriptional regulator [Salmonella enterica]	-	-	-	-	-	-	-
gene3571	8	13.3333	617.247	1921.73	1.63849	0.000605597	0.0125957	yes	SEN_RS16930	50S ribosomal subunit protein L18 [Salmonella enterica subsp. enterica serovar Typhi str. CT18] [Salmonella enterica]	Genetic Information Processing	Translation	ko03010//Ribosome	K02881	GO:0044464//cell part;GO:0005623//cell;GO:1990904//ribonucleoprotein complex;GO:0005622//intracellular;GO:0044424//intracellular part;GO:0032991//macromolecular complex;GO:0030529//intracellular ribonucleoprotein complex	GO:0005198//structural molecule activity;GO:0003723//RNA binding;GO:1901363//heterocyclic compound binding;GO:0003676//nucleic acid binding;GO:0097159//organic cyclic compound binding;GO:0005488//binding	GO:0010467//gene expression;GO:0043170//macromolecule metabolic process;GO:0008152//metabolic process;GO:0071704//organic substance metabolic process
gene3578	8.66667	14.6667	866.303	2709.48	1.64507	0.000119753	0.00309562	yes	SEN_RS16965	30S ribosomal subunit protein S17 [Salmonella enterica subsp. enterica serovar Typhi str. CT18] [Salmonella enterica]	Genetic Information Processing	Translation	ko03010//Ribosome	K02961	-	-	-
gene3579	5	8.66667	648.033	2133.16	1.71885	0.00248036	0.0383608	yes	SEN_RS16970	50S ribosomal subunit protein L29 [Salmonella enterica subsp. enterica serovar Typhi str. CT18] [Salmonella enterica]	Genetic Information Processing	Translation	ko03010//Ribosome	K02904	-	-	-
gene3587	39	49.3333	1684.38	3745.24	1.15284	0.000246903	0.00587857	yes	SEN_RS17010	50S ribosomal protein L3 [Salmonella enterica]	Genetic Information Processing	Translation	ko03010//Ribosome	K02906	-	-	-
gene3591	51.6667	71	2785.89	7345.66	1.39875	7.47942e-07	3.42633e-05	yes	SEN_RS17025	bacterioferritin [Salmonella enterica subsp. enterica serovar Typhimurium str. LT2] [Salmonella enterica]	Metabolism	Metabolism of cofactors and vitamins	ko00860//Porphyrin and chlorophyll metabolism	K03594	-	GO:0005506//iron ion binding;GO:0003824//catalytic activity;GO:0005488//binding;GO:0046872//metal ion binding;GO:0043167//ion binding;GO:0043169//cation binding;GO:0046914//transition metal ion binding	GO:0055065//metal ion homeostasis;GO:0042592//homeostatic process;GO:0055080//cation homeostasis;GO:0019725//cellular homeostasis;GO:0044765//single-organism transport;GO:0006812//cation transport;GO:0065007//biological regulation;GO:1902578//single-organism localization;GO:0006811//ion transport;GO:0006875//cellular metal ion homeostasis;GO:0055082//cellular chemical homeostasis;GO:0008152//meta…
gene3721	97.6667	160	3014.24	10190.7	1.75738	9.77975e-15	1.76965e-12	yes	SEN_RS17635	RNA polymerase sigma-32 factor [Salmonella enterica subsp. enterica serovar Typhi str. CT18] [Salmonella enterica]	-	-	-	-	-	-	-
gene3744	21.6667	2	1274.9	215.667	-2.56351	9.42022e-05	0.00260362	yes	SEN_RS17750	universal stress global response regulator UspA [Salmonella enterica subsp. enterica serovar Typhimurium str. LT2] [Salmonella enterica]	-	-	-	-	-	-	GO:0050896//response to stimulus
gene3748	39	6.66667	776.06	233.783	-1.731	0.00193531	0.0317182	yes	SEN_RS17770	PAP2 family protein [Salmonella enterica subsp. enterica serovar Dublin str. UC16] [Salmonella enterica]	-	-	-	-	-	-	-
gene3805	5	12.3333	215.577	826.367	1.93858	0.000810781	0.0161221	yes	SEN_RS18040	outer membrane protein [Salmonella enterica]	-	-	-	-	-	-	-
gene3811	24	26.6667	1329.75	2680.26	1.01121	0.00206076	0.0332942	yes	SEN_RS18070	N-acetyltransferase [Salmonella enterica]	-	-	-	-	-	-	-
gene3812	7.33333	16.3333	653.977	2871.97	2.13473	0.000177777	0.0043767	yes	SEN_RS18075	toxin-antitoxin system, antitoxin component, ribbon-helix-helix domain protein [Salmonella enterica subsp. enterica serovar Cubana str. 76814] [Salmonella enterica]	-	-	-	-	-	-	-
gene3825	5.33333	9	169.09	752.133	2.1532	0.00211133	0.0339042	yes	SEN_RS18130	gene transcribed divergently from malS [Salmonella enterica subsp. enterica serovar Typhimurium str. LT2] [Salmonella enterica]	-	-	-	-	-	-	-
gene3879	27.6667	5.33333	644.083	212.933	-1.59685	0.00167724	0.0291035	yes	SEN_RS18390	LPS 1,2-N-acetylglucosaminetransferase [Salmonella enterica]	Metabolism	Glycan biosynthesis and metabolism;Global and Overview	ko01100//Metabolic pathways;ko00540//Lipopolysaccharide biosynthesis	K03280	-	-	-
gene3947	2	10	135.68	1166.93	3.10444	4.38336e-05	0.00131102	yes	SEN_RS18695	toxin RelE [Salmonella enterica]	-	-	-	-	-	-	-
gene3994	0	7	0.001	328.34	18.3248	6.52952e-05	0.00187542	yes	SEN_RS18930	2-oxo-3-deoxygalactonate kinase [Salmonella enterica]	Metabolism	Carbohydrate metabolism;Global and Overview	ko01100//Metabolic pathways;ko00052//Galactose metabolism	K00883	-	-	-
gene3995	0.666667	20.6667	23.5933	1475.68	5.96686	6.80888e-12	8.49701e-10	yes	SEN_RS18935	transcriptional regulator [Salmonella enterica]	-	-	-	-	-	-	-
gene402	28	29.6667	1064.78	2432.36	1.19181	0.00235726	0.0369304	yes	SEN_RS01950	DNA-binding response regulator [Salmonella enterica]	Environmental Information Processing	Signal transduction	ko02020//Two-component system	K07657	-	-	-
gene4040	9	26.3333	251.627	1348.28	2.42176	4.36881e-08	2.67978e-06	yes	SEN_RS19155	asparagine synthetase A [Salmonella enterica]	Metabolism	Global and Overview;Metabolism of other amino acids;Amino acid metabolism	ko01100//Metabolic pathways;ko01110//Biosynthesis of secondary metabolites;ko01230//Biosynthesis of amino acids;ko00250//Alanine, aspartate and glutamate metabolism;ko00460//Cyanoamino acid metabolism	K01914	-	-	-
gene4068	4.66667	13.6667	352.193	1504.92	2.09525	0.00101527	0.0193382	yes	SEN_RS19290	cytoplasmic protein [Salmonella enterica]	-	-	-	-	-	-	-
gene409	0.666667	8.33333	15.2867	366.997	4.58542	1.01672e-06	4.43317e-05	yes	SEN_RS01985	tRNA preQ1(34) S-adenosylmethionine ribosyltransferase-isomerase QueA [Salmonella enterica]	-	-	-	-	-	-	-
gene4120	1.33333	6.33333	17.62	167.347	3.24755	0.000506473	0.0109939	yes	SEN_RS19530	DNA helicase RecQ [Salmonella enterica]	Genetic Information Processing	Folding, sorting and degradation	ko03018//RNA degradation	K03654	-	-	-
gene4130	24.3333	2.66667	843.617	168.133	-2.32698	2.20605e-05	0.000719171	yes	SEN_RS19580	uridine phosphorylase [Salmonella enterica subsp. enterica serovar Typhi str. CT18] [Salmonella enterica]	Metabolism	Nucleotide metabolism;Global and Overview	ko01100//Metabolic pathways;ko00240//Pyrimidine metabolism	K00757	-	-	-
gene4172	17.3333	20.6667	244.757	541.457	1.1455	0.000501259	0.0109939	yes	SEN_RS19775	GTP-binding protein TypA [Salmonella enterica]	-	-	-	-	-	-	-
gene4179	0.666667	4.33333	23.4933	372.537	3.98706	0.000568009	0.0118822	yes	ompL	oligogalacturonate-specific porin protein [Salmonella enterica subsp. enterica serovar Infantis str. SARB27] [Salmonella enterica]	-	-	-	-	-	-	-
gene4193	15	37	897.137	3643.14	2.02178	6.6546e-05	0.0018963	yes	SEN_RS19880	transcriptional regulator [Salmonella enterica]	-	-	-	-	-	-	-
gene4194	51	175.667	4340.46	28225.8	2.7011	4.49527e-26	1.47894e-23	yes	SEN_RS19885	cytoplasmic protein [Salmonella enterica subsp. enterica serovar Pullorum str. S06004] [Salmonella enterica]	-	-	-	-	-	GO:0003824//catalytic activity;GO:0016787//hydrolase activity	-
gene42	21.3333	50.6667	2113.66	8237.41	1.96245	2.88495e-06	0.000118644	yes	SEN_RS00220	30S ribosomal protein S20 [Salmonella enterica subsp. enterica serovar Typhi str. CT18] [Salmonella enterica]	Genetic Information Processing	Translation	ko03010//Ribosome	K02968	GO:0005623//cell;GO:0030529//intracellular ribonucleoprotein complex;GO:0032991//macromolecular complex;GO:1990904//ribonucleoprotein complex;GO:0005622//intracellular;GO:0044424//intracellular part;GO:0044464//cell part	GO:0005488//binding;GO:0003723//RNA binding;GO:0003676//nucleic acid binding;GO:0097159//organic cyclic compound binding;GO:0005198//structural molecule activity;GO:1901363//heterocyclic compound binding	GO:0043170//macromolecule metabolic process;GO:0071704//organic substance metabolic process;GO:0010467//gene expression;GO:0008152//metabolic process
gene4323	32.3333	40	214.933	499.727	1.21725	2.11848e-05	0.000703375	yes	SEN_RS20525	DNA-directed RNA polymerase subunit beta [Salmonella enterica]	Genetic Information Processing;Metabolism	Nucleotide metabolism;Transcription;Global and Overview	ko01100//Metabolic pathways;ko00230//Purine metabolism;ko00240//Pyrimidine metabolism;ko03020//RNA polymerase	K03043	-	-	-
gene4381	3.66667	8	46.01	190.563	2.05025	0.000730617	0.0146083	yes	SEN_RS20800	lipoprotein [Salmonella enterica]	-	-	-	-	-	-	-
gene4410	3.66667	22.3333	34.1433	428.987	3.65126	4.91785e-10	4.3409e-08	yes	SEN_RS20945	excinuclease ABC subunit A [Salmonella enterica]	Genetic Information Processing	Replication and repair	ko03420//Nucleotide excision repair	K03701	-	-	-
gene4412	3	16.3333	151.047	1551.79	3.36087	7.64228e-09	5.53148e-07	yes	SEN_RS20955	ssDNA-binding protein [Salmonella enterica subsp. enterica serovar Paratyphi C str. RKS4594] [Salmonella enterica]	Genetic Information Processing	Replication and repair	ko03440//Homologous recombination;ko03430//Mismatch repair;ko03030//DNA replication	K03111	-	-	-
gene4418	57.6667	100.667	91.5033	332.833	1.8629	4.24585e-11	4.3902e-09	yes	SEN_RS20980	membrane protein [Salmonella enterica]	-	-	-	-	-	-	-
gene4419	1.66667	9.66667	20.81	248.87	3.58004	2.95475e-05	0.000938005	yes	SEN_RS20985	antibiotic ABC transporter ATP-binding protein [Salmonella enterica]	Environmental Information Processing	Membrane transport	ko02010//ABC transporters	K06148	-	-	-
gene445	2.66667	17	43.5933	502.97	3.52829	1.07629e-08	7.43699e-07	yes	SEN_RS02155	tetratricopeptide repeat protein [Salmonella enterica subsp. enterica serovar Saintpaul str. SARA23] [Salmonella enterica]	-	-	-	-	-	-	-
gene4450	9.33333	0.666667	225.783	17.7867	-3.66607	0.00202698	0.0328952	yes	SEN_RS21145	two-component sensor histidine kinase [Salmonella enterica]	Environmental Information Processing	Signal transduction	ko02020//Two-component system	K07643	-	-	-
gene4484	90	18	1667.97	527.973	-1.65956	9.61676e-05	0.0026366	yes	SEN_RS21315	aspartate ammonia-lyase [Salmonella enterica subsp. enterica serovar Typhimurium str. ST4/74] [Salmonella enterica]	Metabolism	Amino acid metabolism;Global and Overview	ko01100//Metabolic pathways;ko00250//Alanine, aspartate and glutamate metabolism	K01744	-	-	-
gene4490	12.3333	25.3333	391.487	1523.58	1.96043	4.2932e-07	2.15793e-05	yes	SEN_RS21350	protein yjeJ [Salmonella enterica subsp. enterica serovar Montevideo str. USDA-ARS-USMARC-1903] [Salmonella enterica]	-	-	-	-	-	-	-
gene4518	8.33333	10.6667	235.89	596.663	1.3388	0.00336539	0.0485233	yes	SEN_RS21490	tRNA (adenosine(37)-N6)-dimethylallyltransferase MiaA [Salmonella enterica]	-	-	-	-	-	-	-
gene460	22.3333	2.66667	2209.69	279.127	-2.98485	9.254e-06	0.000334902	yes	SEN_RS02220	DNA-binding protein HU-beta [Salmonella enterica subsp. enterica serovar Typhi str. CT18] [Salmonella enterica]	-	-	-	-	-	-	-
gene4614	19.6667	1.66667	1223.9	114.21	-3.42172	5.92118e-06	0.000227966	yes	SEN_RS21950	RNase E inhibitor protein [Salmonella enterica subsp. enterica serovar Typhi str. CT18] [Salmonella enterica]	-	-	-	-	-	-	-
gene4624	6	10.3333	145.693	437.367	1.58591	0.0021924	0.0347995	yes	SEN_RS22000	lipopolysaccharide ABC transporter permease LptF [Salmonella enterica subsp. enterica serovar Infantis str. 335-3] [Salmonella enterica]	Environmental Information Processing	Membrane transport	ko02010//ABC transporters	K07091	-	-	-
gene4642	4	9.66667	45.6333	227.87	2.32005	0.00322608	0.0468883	yes	SEN_RS22080	outer membrane usher protein SefC [Salmonella enterica]	-	-	-	-	-	-	-
gene4655	19	25.3333	693.3	1960.46	1.49964	0.00145921	0.0262731	yes	SEN_RS22135	YebC/PmpR family DNA-binding transcriptional regulator [Salmonella enterica]	-	-	-	-	-	-	-
gene468	2	6.33333	116.49	773.46	2.73112	0.00105622	0.0199086	yes	SEN_RS02260	transcriptional regulator, AsnC family [Salmonella enterica subsp. enterica serovar Infantis str. SARB27] [Salmonella enterica]	-	-	-	-	-	-	-
gene469	0.333333	4.66667	5.89667	119.99	4.34687	0.00280244	0.0418685	yes	SEN_RS02265	multidrug ABC transporter permease/ATP-binding protein [Salmonella enterica]	-	-	-	-	-	-	-
gene499	0.666667	4.66667	25.24	467.173	4.21017	0.00151172	0.0269504	yes	SEN_RS02400	adenylate kinase [Salmonella enterica]	Metabolism	Nucleotide metabolism;Global and Overview	ko01100//Metabolic pathways;ko01110//Biosynthesis of secondary metabolites;ko01130//Biosynthesis of antibiotics;ko00230//Purine metabolism	K00939	-	-	-
gene503	8	12.3333	127.533	355.853	1.48041	0.00167263	0.0291035	yes	SEN_RS02420	Kef family K(+) transporter [Salmonella enterica]	-	-	-	-	-	-	-
gene595	4.33333	8.66667	31.41	126.64	2.01144	0.00308741	0.0452362	yes	entF	enterobactin synthase subunit F [Salmonella enterica]	Metabolism	Global and Overview;Metabolism of terpenoids and polyketides	ko01110//Biosynthesis of secondary metabolites;ko01130//Biosynthesis of antibiotics;ko01053//Biosynthesis of siderophore group nonribosomal peptides	K02364	-	-	-
gene601	0	4.33333	0.001	269.77	18.0414	0.000559692	0.0117763	yes	SEN_RS02880	Fe2+-enterobactin ABC transporter substrate-binding protein [Salmonella enterica]	Environmental Information Processing	Membrane transport	ko02010//ABC transporters	K02016	-	-	-
gene612	2	9.33333	39.52	408.483	3.36962	4.75307e-07	2.32451e-05	yes	SEN_RS02935	phosphoadenosine phosphosulfate reductase [Salmonella enterica]	-	-	-	-	-	-	-
gene622	14	0.333333	883.243	22.2033	-5.31396	6.30756e-06	0.000240285	yes	SEN_RS02980	universal stress protein G [Salmonella enterica]	-	-	-	-	-	-	-
gene643	1.66667	9	49.3167	424.327	3.10503	0.000558098	0.0117763	yes	SEN_RS03075	lipoyl synthase [Salmonella enterica]	Metabolism	Global and Overview;Metabolism of cofactors and vitamins	ko01100//Metabolic pathways;ko00785//Lipoic acid metabolism	K03644	-	-	-
gene767	6.33333	12	196.96	614.53	1.64158	0.00281129	0.0418685	yes	SEN_RS03675	LysR family transcriptional regulator [Salmonella enterica]	-	-	-	-	-	-	-
gene768	2	13	54.34	684.753	3.6555	2.60349e-09	2.04827e-07	yes	SEN_RS03680	LysR family transcriptional regulator [Salmonella enterica]	-	-	-	-	-	-	-
gene769	0	5.33333	0.001	204.51	17.6418	0.00176151	0.0299292	yes	SEN_RS03685	cation transporter [Salmonella enterica]	-	-	-	-	-	-	-
gene804	5	13.6667	66.11	392.51	2.56979	7.32211e-07	3.40908e-05	yes	SEN_RS03850	excision nuclease ABC subunit B [Salmonella enterica subsp. enterica serovar Bovismorbificans] [Salmonella enterica]	Genetic Information Processing	Replication and repair	ko03420//Nucleotide excision repair	K03702	-	-	-
gene836	14	2.33333	488.667	89.26	-2.45276	0.00269811	0.0408555	yes	SEN_RS04010	amino acid ABC transporter substrate-binding protein [Salmonella enterica]	Environmental Information Processing	Membrane transport	ko02010//ABC transporters	K10036	-	-	-
gene837	71	19	3766.21	1834.61	-1.03764	0.00017647	0.00437427	yes	SEN_RS04015	DNA starvation/stationary phase protection protein [Salmonella enterica]	-	-	-	-	-	-	-
gene849	9.66667	14	322.863	1116.03	1.78938	0.0030637	0.0450712	yes	SEN_RS04070	sugar-phosphatase [Salmonella enterica]	-	-	-	-	-	-	-
gene863	8.66667	13.6667	258.373	788.963	1.6105	2.14033e-05	0.00070417	yes	SEN_RS04135	electron transfer flavoprotein subunit beta [Salmonella enterica]	-	-	-	-	-	-	-
gene864	3	13.3333	79.2233	533.84	2.75241	4.92918e-06	0.000191814	yes	SEN_RS04140	electron transfer flavoprotein subunit alpha [Salmonella enterica]	-	-	-	-	-	-	-
gene866	4.66667	10.6667	105.857	479.663	2.17991	0.0014202	0.0256985	yes	SEN_RS04150	acyl-CoA dehydrogenase [Salmonella enterica]	Metabolism	Carbohydrate metabolism;Lipid metabolism;Metabolism of other amino acids;Global and Overview;Amino acid metabolism	ko01100//Metabolic pathways;ko01110//Biosynthesis of secondary metabolites;ko01130//Biosynthesis of antibiotics;ko01200//Carbon metabolism;ko00640//Propanoate metabolism;ko01212//Fatty acid metabolism;ko00071//Fatty acid degradation;ko00410//beta-Alanine metabolism;ko00280//Valine, leucine and isoleucine degradation	K00249	-	-	-
gene868	5.33333	13.6667	88.23	405.49	2.20033	0.000110022	0.00294942	yes	SEN_RS04155	dehydrogenase [Salmonella enterica]	-	-	-	-	-	-	-
gene875	2.33333	8	78.1267	486.303	2.63797	0.000193477	0.00469927	yes	SEN_RS04190	DNA-binding transcriptional repressor DeoR [Salmonella enterica]	-	-	-	-	-	-	-
gene930	18	38.3333	2112.89	7581.43	1.84326	1.37418e-05	0.000472978	yes	SEN_RS04445	translation initiation factor IF-1 [Escherichia coli O157:H7 str. Sakai] [Escherichia coli]	-	-	-	-	GO:0044424//intracellular part;GO:0005623//cell;GO:0044464//cell part;GO:0005622//intracellular	GO:0003676//nucleic acid binding;GO:0097159//organic cyclic compound binding;GO:0008135//translation factor activity, RNA binding;GO:0003723//RNA binding;GO:0005488//binding;GO:1901363//heterocyclic compound binding	GO:0044238//primary metabolic process;GO:0044249//cellular biosynthetic process;GO:0043604//amide biosynthetic process;GO:0043603//cellular amide metabolic process;GO:0043043//peptide biosynthetic process;GO:0034645//cellular macromolecule biosynthetic process;GO:0010467//gene expression;GO:0044260//cellular macromolecule metabolic process;GO:0009059//macromolecule biosynthetic process;GO:0009987…
gene937	37.6667	5	1975.18	418.213	-2.23967	6.51969e-05	0.00187542	yes	SEN_RS04475	leucine-responsive transcriptional regulator [Salmonella enterica subsp. enterica serovar Typhimurium str. LT2] [Salmonella enterica]	-	-	-	-	GO:0005623//cell;GO:0044464//cell part	GO:0097159//organic cyclic compound binding;GO:1901363//heterocyclic compound binding;GO:0003676//nucleic acid binding;GO:0005488//binding;GO:0003677//DNA binding;GO:0001071//nucleic acid binding transcription factor activity	GO:0044249//cellular biosynthetic process;GO:0034645//cellular macromolecule biosynthetic process;GO:0008152//metabolic process;GO:0019222//regulation of metabolic process;GO:0050789//regulation of biological process;GO:0009987//cellular process;GO:0071704//organic substance metabolic process;GO:0065007//biological regulation;GO:0043170//macromolecule metabolic process;GO:0060255//regulation of m…
gene950	794	110.667	21996.2	5839	-1.91347	1.18094e-40	1.42461e-37	yes	SEN_RS04540	pathogenicity island 1 protein SopD2 [Salmonella enterica]	-	-	-	-	-	-	-
gene951	55.6667	7.33333	665.39	168.02	-1.98557	1.38535e-05	0.000472978	yes	SEN_RS04545	formate acetyltransferase [Salmonella enterica]	Metabolism	Carbohydrate metabolism;Global and Overview	ko01100//Metabolic pathways;ko01120//Microbial metabolism in diverse environments;ko00620//Pyruvate metabolism;ko00640//Propanoate metabolism;ko00650//Butanoate metabolism	K00656	-	-	-
gene952	15	0.666667	456.607	50.69	-3.17118	0.00155509	0.0275877	yes	SEN_RS04550	formate transporter [Salmonella enterica subsp. enterica serovar Infantis str. 335-3] [Salmonella enterica]	-	-	-	-	-	-	-
gene958	0.666667	5	30.5667	485.63	3.98983	0.00168075	0.0291035	yes	SEN_RS04580	cytidylate kinase [Salmonella enterica]	Metabolism	Global and Overview;Nucleotide metabolism	ko01100//Metabolic pathways;ko00240//Pyrimidine metabolism	K00945	-	-	-
gene959	257.333	253.667	4080.29	8837.8	1.11502	7.22002e-05	0.00204135	yes	SEN_RS04585	30S ribosomal protein S1 [Salmonella enterica]	Genetic Information Processing	Translation	ko03010//Ribosome	K02945	-	-	-
gene987	2.66667	7.33333	118.623	563.137	2.2471	0.00170695	0.0292771	yes	SEN_RS04715	ORF31 [Salmonella enterica subsp. enterica serovar Dublin] [Salmonella enterica]	-	-	-	-	-	-	-
gene992	40.62	4.66667	1081.04	191.197	-2.49929	3.97782e-06	0.000156476	yes	SEN_RS04735	secreted effector protein SseI [Salmonella enterica]	-	-	-	-	-	-	-

## Sheet: T_6h-vs-T_9h.genes.filter.annot
Differentially expressed mRNAs between T_6h and T_9h
id	T_6h_count	T_9h_count	T_6h_fpkm	T_9h_fpkm	log2(FC)	Pvalue	FDR	significant	Symbol	Description	KEGG_A_class	KEGG_B_class	Pathway	K_ID	GO Component	GO Function	GO Process
gene10	28	30.6667	1584.88	764.58	-1.05163	0.00107399	0.0436842	yes	SEN_RS00060	molecular chaperone DnaK [Salmonella enterica]	Genetic Information Processing	Folding, sorting and degradation	ko03018//RNA degradation	K04043	-	-	-
gene1026	3.33333	30.6667	505.11	2049.65	2.02071	0.000265653	0.0142356	yes	SEN_RS04905	BAX inhibitor protein [Salmonella enterica]	-	-	-	-	-	-	-
gene1029	97.3333	48.3333	11563.3	2528.49	-2.1932	5.37791e-14	1.81558e-11	yes	SEN_RS04920	effector protein PipB [Salmonella enterica]	-	-	-	-	-	-	-
gene1035	10.6667	2.66667	781.92	122.473	-2.67455	1.24465e-05	0.00102486	yes	SEN_RS04955	peptidase [Salmonella enterica]	-	-	-	-	-	-	-
gene1075	15.3333	73.6667	1122.19	2473.02	1.13996	0.000975184	0.0403928	yes	SEN_RS05125	acetylneuraminate ABC transporter [Salmonella enterica]	-	-	-	-	-	-	-
gene1139	1.33333	18	109.223	767.093	2.81212	0.000138975	0.00808933	yes	SEN_RS05430	flagellar filament capping protein FliD [Salmonella enterica]	Cellular Processes	Cell motility	ko02040//Flagellar assembly	K02407	-	-	-
gene1208	0	6.66667	0.001	510.517	18.9616	0.000642829	0.0293269	yes	SEN_RS05770	Mn2+/Zn2+ABC transporter ATP-binding protein [Salmonella enterica]	Environmental Information Processing	Membrane transport	ko02010//ABC transporters	K09817	-	-	-
gene1220	2	22	717.23	4206.55	2.55213	9.05751e-05	0.00555966	yes	SEN_RS05820	DNA damage-inducible protein [Salmonella enterica]	-	-	-	-	-	-	-
gene1222	1	15.3333	158.06	1205.19	2.93072	0.000426248	0.0205574	yes	SEN_RS05830	protein YebE [Salmonella enterica]	-	-	-	-	-	-	-
gene1248	84	45.3333	16771.2	3987.16	-2.07255	1.40973e-11	3.39947e-09	yes	SEN_RS05960	Superoxide dismutase [Cu-Zn] 1 [Salmonella enterica]	-	-	-	-	-	-	-
gene1268	11	5	4406.52	658.743	-2.74185	0.00029134	0.0150709	yes	SEN_RS23130	phage encoded protein PagM [Salmonella enterica subsp. enterica serovar Newport str. WA_14881] [Salmonella enterica]	-	-	-	-	-	-	-
gene1377	7.66667	0.333333	246.623	2.54333	-6.59944	2.86848e-06	0.000310891	yes	SEN_RS06590	nitrate reductase subunit alpha [Salmonella enterica]	Environmental Information Processing;Metabolism	Signal transduction;Energy metabolism;Global and Overview	ko01120//Microbial metabolism in diverse environments;ko02020//Two-component system;ko00910//Nitrogen metabolism	K00370	-	-	-
gene1378	5.33333	0	394.58	0.001	-18.59	6.652e-05	0.00443359	yes	SEN_RS06595	nitrate reductase subunit beta [Salmonella enterica]	Environmental Information Processing;Metabolism	Global and Overview;Signal transduction;Energy metabolism	ko01120//Microbial metabolism in diverse environments;ko02020//Two-component system;ko00910//Nitrogen metabolism	K00371	-	-	-
gene1454	51.6667	11.6667	3998.62	438.25	-3.18968	2.15743e-16	1.0405e-13	yes	SEN_RS06925	Secreted effector kinase SteC [Salmonella enterica subsp. enterica serovar Enteritidis str. EC20121180] [Salmonella enterica]	-	-	-	-	-	-	-
gene1525	7.33333	4	1859.38	445.277	-2.06205	0.000942285	0.0402678	yes	SEN_RS07265	universal stress protein F [Salmonella enterica]	-	-	-	-	-	-	-
gene1541	2.66667	21.6667	160.9	773.76	2.26572	0.00033797	0.0170297	yes	SEN_RS07345	Dolichyl-phosphate-mannose-protein mannosyltransferase [Salmonella enterica subsp. enterica serovar Enteritidis] [Salmonella enterica]	-	-	-	-	-	-	-
gene1545	17.6667	10	2381.82	735.693	-1.69489	2.45917e-05	0.00188686	yes	SEN_RS07365	amino acid-binding protein [Salmonella enterica]	-	-	-	-	-	-	-
gene1547	84.6667	30.6667	7361.07	1177.17	-2.6446	2.18461e-30	2.45841e-27	yes	SEN_RS07375	secreted effector protein SseJ [Salmonella enterica]	-	-	-	-	-	-	-
gene1602	80.6667	51	14593	4005.38	-1.86526	2.21613e-06	0.000249388	yes	SEN_RS07630	effector protein steA [Salmonella enterica subsp. enterica serovar Enteritidis str. 10-34587] [Salmonella enterica]	-	-	-	-	-	-	-
gene1611	0.333333	15	23.37	487.153	4.38165	6.99432e-06	0.000638184	yes	SEN_RS07675	MFS transporter [Salmonella enterica]	-	-	-	-	-	-	-
gene1638	57.6667	56.3333	5738.72	2533.93	-1.17935	3.05993e-07	3.82605e-05	yes	SEN_RS07800	isomerase [Salmonella enterica]	-	-	-	-	-	-	-
gene1702	20.3333	13.6667	7828.02	1980.95	-1.98246	0.000575294	0.0266054	yes	SEN_RS08115	acid shock protein precursor [Salmonella enterica]	-	-	-	-	-	-	-
gene1744	43	32	10111.2	3520.82	-1.52198	3.86086e-08	6.51712e-06	yes	SEN_RS08320	MarR family transcriptional regulator [Salmonella enterica]	-	-	-	-	-	-	-
gene1767	5.66667	0.666667	476.51	17.99	-4.72724	0.000707538	0.0310214	yes	SEN_RS08430	EscU/YscU/HrcU family type III secretion system export apparatus switch protein [Salmonella enterica]	Environmental Information Processing	Membrane transport	ko03070//Bacterial secretion system	K03229	-	-	-
gene1770	32.6667	14.6667	5551.92	957.893	-2.53505	1.34411e-08	2.38827e-06	yes	SEN_RS08445	EscR/YscR/HrcR family type III secretion system export apparatus protein [Salmonella enterica]	Environmental Information Processing	Membrane transport	ko03070//Bacterial secretion system	K03226	-	-	-
gene1777	15	8.66667	1575	396.663	-1.98936	9.27821e-06	0.000790814	yes	SEN_RS08480	type III secretion system protein SsaL [Salmonella enterica]	-	-	-	-	-	-	-
gene1780	59	19	8278.03	1200.39	-2.78578	9.85385e-23	8.31665e-20	yes	SEN_RS08495	type III secretion system lipoprotein SsaJ [Salmonella enterica]	Environmental Information Processing	Membrane transport	ko03070//Bacterial secretion system	K03222	-	-	-
gene1782	23	7	8572.2	1180.62	-2.86012	1.79031e-10	3.77755e-08	yes	SEN_RS08505	type III secretion system protein SsaH [Salmonella enterica]	-	-	-	-	-	-	-
gene1789	61.3333	25.6667	4578.92	749.687	-2.61065	2.20373e-10	4.19484e-08	yes	SEN_RS08540	pathogenicity island 2 effector protein SseC [Salmonella enterica]	-	-	-	-	-	-	-
gene1790	18	5.33333	4300.08	592.153	-2.86032	2.71283e-05	0.00203523	yes	SEN_RS08545	type III secretion low calcium response chaperone LcrH/SycD [Salmonella enterica subsp. enterica serovar Schwarzengrund str. CVM19633] [Salmonella enterica]	-	-	-	-	-	-	-
gene1791	81	15.6667	15236.4	1015.91	-3.90668	2.22812e-14	8.35794e-12	yes	SEN_RS08550	secreted effector protein SseB [Salmonella enterica]	-	-	-	-	-	-	-
gene1792	29	10.3333	9278.02	1538.08	-2.59269	3.33594e-13	1.02383e-10	yes	SEN_RS08555	type III secretion system chaperone SseA [Salmonella enterica]	-	-	-	-	-	-	-
gene1796	33	18	2329.56	434.207	-2.4236	6.69766e-05	0.00443359	yes	SEN_RS08570	EscC/YscC/HrcC family type III secretion system outer membrane ring protein [Salmonella enterica]	Environmental Information Processing	Membrane transport	ko03070//Bacterial secretion system	K03219	-	-	-
gene1797	21.6667	10.3333	5769.69	1121.97	-2.36246	2.7237e-07	3.53662e-05	yes	spiC	pathogenicity island chaperone protein SpiC [Salmonella enterica]	-	-	-	-	-	-	-
gene1799	21.3333	15.6667	3540.87	1231.09	-1.52417	6.68051e-05	0.00443359	yes	SEN_RS08585	DNA-binding response regulator [Salmonella enterica]	Environmental Information Processing	Signal transduction	ko02020//Two-component system	K14979	-	-	-
gene1886	1.66667	22.6667	215.25	1213.04	2.49455	0.000652536	0.0293728	yes	SEN_RS08995	nucleotide excision repair endonuclease [Salmonella enterica]	-	-	-	-	-	-	-
gene1964	151.667	96	29159.4	8402.27	-1.79511	2.07555e-18	1.40141e-15	yes	SEN_RS09370	membrane protein [Salmonella enterica]	Environmental Information Processing	Signal transduction	ko02020//Two-component system	K07804	-	-	-
gene1998	23.3333	125.667	8989.4	23293.5	1.37363	0.000218897	0.0120253	yes	SEN_RS09540	Multiple stress resistance protein BhsA [Salmonella enterica subsp. enterica serovar Typhi str. P-stx-12] [Salmonella enterica]	-	-	-	-	-	-	-
gene2337	14.3333	4.66667	3743.63	722.61	-2.37315	4.84497e-06	0.000481077	yes	SEN_RS11100	tir chaperone [Salmonella enterica]	-	-	-	-	-	-	-
gene2425	2.66667	26	827.467	4127.42	2.31847	8.86265e-05	0.0055408	yes	SEN_RS11515	YejG-like protein [Salmonella enterica subsp. enterica serovar Typhi] [Salmonella enterica]	-	-	-	-	-	-	-
gene2442	13	8.33333	2354.42	752.463	-1.64568	0.000668194	0.0296819	yes	SEN_RS11595	outer membrane protein [Salmonella enterica]	-	-	-	-	-	-	-
gene2487	228.667	96.3333	24086.7	4676.08	-2.36486	7.98311e-41	1.34755e-37	yes	SEN_RS11805	deubiquitinase [Salmonella enterica subsp. enterica serovar Gallinarum str. SG9] [Salmonella enterica]	-	-	-	-	-	-	-
gene2766	0	16.6667	0.001	1696.33	20.694	1.01189e-07	1.62673e-05	yes	SEN_RS13130	Fe-S cluster assembly transcriptional regulator IscR [Salmonella enterica]	-	-	-	-	-	-	-
gene2768	5	52.3333	577.047	3553.8	2.6226	9.36984e-06	0.000790814	yes	SEN_RS13140	inositol monophosphatase [Salmonella enterica]	Metabolism	Carbohydrate metabolism;Global and Overview;Biosynthesis of other secondary metabolites	ko01100//Metabolic pathways;ko00521//Streptomycin biosynthesis;ko00562//Inositol phosphate metabolism	K01092	-	-	-
gene2778	33.6667	29.6667	3041.51	1370.68	-1.1499	0.000981106	0.0403928	yes	SEN_RS13190	flavohemoprotein [Salmonella enterica]	-	-	-	-	-	-	-
gene2817	6.66667	0	1849.86	0.001	-20.819	4.02018e-06	0.000411277	yes	SEN_RS13375	autonomous glycyl radical cofactor GrcA [Salmonella enterica subsp. enterica serovar Typhi str. CT18] [Salmonella enterica]	-	-	-	-	-	-	-
gene2835	38.3333	7	12037.9	905.3	-3.73305	1.50126e-12	4.22355e-10	yes	SEN_RS13465	translation inhibitor protein RaiA [Salmonella enterica]	-	-	-	-	-	-	-
gene2879	168.333	111	17208	4868.63	-1.82149	2.10787e-07	3.09238e-05	yes	SEN_RS13655	effector protein PipB2 [Salmonella enterica]	-	-	-	-	-	-	-
gene2881	200.333	206.333	23346.7	10483.8	-1.15506	1.65608e-06	0.00019279	yes	SEN_RS13660	VirG localization protein VirK [Salmonella enterica]	-	-	-	-	-	-	-
gene289	16	118	599.18	2074.6	1.79177	2.21944e-12	5.76372e-10	yes	SEN_RS01400	type IV secretion protein Rhs [Salmonella enterica]	-	-	-	-	-	-	-
gene2934	14.6667	116.333	1380.11	5827.47	2.07809	2.23659e-10	4.19484e-08	yes	SEN_RS13915	RecA protein [Salmonella enterica subsp. enterica serovar Typhimurium] [Salmonella enterica]	Genetic Information Processing	Replication and repair	ko03440//Homologous recombination	K03553	-	-	-
gene3013	2	68.6667	317.68	5194.46	4.03133	3.98108e-18	2.24002e-15	yes	SEN_RS14295	Serine/threonine-protein phosphatase 2 [Salmonella enterica]	-	-	-	-	-	-	-
gene302	3.66667	35.3333	163.917	766.95	2.22617	8.25035e-06	0.000732978	yes	SEN_RS01450	pilin outer membrane usher protein SafC [Salmonella enterica]	-	-	-	-	-	-	-
gene308	56.3333	26.3333	8840.33	1833.97	-2.26913	2.19838e-07	3.09238e-05	yes	SEN_RS01485	outer membrane protein PagN [Salmonella enterica]	-	-	-	-	-	-	-
gene315	2	26	218.217	1163.36	2.41447	3.21129e-05	0.0023568	yes	SEN_RS01520	DNA polymerase IV [Salmonella enterica]	-	-	-	-	-	-	-
gene3158	9.66667	52.3333	2437.7	6288.9	1.36729	0.000892712	0.0386384	yes	SEN_RS14970	tRNA(fMet)-specific endonuclease VapC [Salmonella enterica]	-	-	-	-	-	-	-
gene3254	9.66667	3	848.253	94.5867	-3.16479	2.21055e-05	0.00173554	yes	SEN_RS15405	acetyl-CoA hydrolase [Salmonella enterica]	Metabolism	Carbohydrate metabolism	ko00660//C5-Branched dibasic acid metabolism	K18288	-	-	-
gene3292	3	24	564.553	2548.24	2.17432	0.000422881	0.0205574	yes	SEN_RS15585	RNA helicase [Salmonella enterica]	-	-	-	-	-	-	-
gene3432	31	25.3333	3468.33	1390.32	-1.31883	6.63638e-06	0.000622345	yes	SEN_RS16250	transcriptional regulator [Salmonella enterica]	-	-	-	-	-	-	-
gene3591	13	71	2738.46	7345.66	1.42353	8.61117e-05	0.00548516	yes	SEN_RS17025	bacterioferritin [Salmonella enterica subsp. enterica serovar Typhimurium str. LT2] [Salmonella enterica]	Metabolism	Metabolism of cofactors and vitamins	ko00860//Porphyrin and chlorophyll metabolism	K03594	-	GO:0005506//iron ion binding;GO:0003824//catalytic activity;GO:0005488//binding;GO:0046872//metal ion binding;GO:0043167//ion binding;GO:0043169//cation binding;GO:0046914//transition metal ion binding	GO:0055065//metal ion homeostasis;GO:0042592//homeostatic process;GO:0055080//cation homeostasis;GO:0019725//cellular homeostasis;GO:0044765//single-organism transport;GO:0006812//cation transport;GO:0065007//biological regulation;GO:1902578//single-organism localization;GO:0006811//ion transport;GO:0006875//cellular metal ion homeostasis;GO:0055082//cellular chemical homeostasis;GO:0008152//meta…
gene3659	8	2	366.297	40.4567	-3.17856	2.94684e-06	0.000310891	yes	SEN_RS17335	ferrous iron transporter B [Salmonella enterica]	-	-	-	-	-	-	-
gene3721	34.6667	160	4248.62	10190.7	1.26218	2.47964e-07	3.34851e-05	yes	SEN_RS17635	RNA polymerase sigma-32 factor [Salmonella enterica subsp. enterica serovar Typhi str. CT18] [Salmonella enterica]	-	-	-	-	-	-	-
gene3723	0	7	0.001	595.68	19.1842	0.000379481	0.0188401	yes	SEN_RS17645	cell division protein FtsE [Salmonella enterica]	Environmental Information Processing	Membrane transport	ko02010//ABC transporters	K09812	-	-	-
gene3748	11.6667	6.66667	1002.84	233.783	-2.10085	9.47406e-05	0.0057115	yes	SEN_RS17770	PAP2 family protein [Salmonella enterica subsp. enterica serovar Dublin str. UC16] [Salmonella enterica]	-	-	-	-	-	-	-
gene3811	3.66667	26.6667	772.507	2680.26	1.79475	0.000442411	0.0210363	yes	SEN_RS18070	N-acetyltransferase [Salmonella enterica]	-	-	-	-	-	-	-
gene4130	8.33333	2.66667	1321.96	168.133	-2.975	0.000220843	0.0120253	yes	SEN_RS19580	uridine phosphorylase [Salmonella enterica subsp. enterica serovar Typhi str. CT18] [Salmonella enterica]	Metabolism	Nucleotide metabolism;Global and Overview	ko01100//Metabolic pathways;ko00240//Pyrimidine metabolism	K00757	-	-	-
gene4194	20.3333	175.667	6941.48	28225.8	2.0237	3.00581e-16	1.26845e-13	yes	SEN_RS19885	cytoplasmic protein [Salmonella enterica subsp. enterica serovar Pullorum str. S06004] [Salmonella enterica]	-	-	-	-	-	GO:0003824//catalytic activity;GO:0016787//hydrolase activity	-
gene4381	0	8	0.001	190.563	17.5399	0.00113504	0.0456178	yes	SEN_RS20800	lipoprotein [Salmonella enterica]	-	-	-	-	-	-	-
gene4410	2	22.3333	71.3	428.987	2.58896	3.32796e-05	0.00239047	yes	SEN_RS20945	excinuclease ABC subunit A [Salmonella enterica]	Genetic Information Processing	Replication and repair	ko03420//Nucleotide excision repair	K03701	-	-	-
gene4415	0	7.33333	0.001	311.36	18.2482	0.000219635	0.0120253	yes	SEN_RS20965	membrane protein [Salmonella enterica]	-	-	-	-	-	-	-
gene4418	17.3333	100.667	110.177	332.833	1.59498	0.000294633	0.0150709	yes	SEN_RS20980	membrane protein [Salmonella enterica]	-	-	-	-	-	-	-
gene4419	0	9.66667	0.001	248.87	17.925	0.000167841	0.00960391	yes	SEN_RS20985	antibiotic ABC transporter ATP-binding protein [Salmonella enterica]	Environmental Information Processing	Membrane transport	ko02010//ABC transporters	K06148	-	-	-
gene445	0.666667	17	65.97	502.97	2.93059	0.000489057	0.0229313	yes	SEN_RS02155	tetratricopeptide repeat protein [Salmonella enterica subsp. enterica serovar Saintpaul str. SARA23] [Salmonella enterica]	-	-	-	-	-	-	-
gene4560	9.66667	4.33333	1499.91	297.37	-2.33454	7.45023e-05	0.00483692	yes	SEN_RS21695	iron-sulfur cluster repair protein YtfE [Salmonella enterica]	-	-	-	-	-	-	-
gene612	0	9.33333	0.001	408.483	18.6399	0.000270284	0.0142575	yes	SEN_RS02935	phosphoadenosine phosphosulfate reductase [Salmonella enterica]	-	-	-	-	-	-	-
gene616	18.6667	7.66667	3441.32	518.453	-2.73068	1.78209e-07	2.7347e-05	yes	SEN_RS02950	alkyl hydroperoxide reductase c22 protein [Salmonella enterica subsp. enterica serovar Typhi str. CT18] [Salmonella enterica]	-	-	-	-	-	GO:0003824//catalytic activity;GO:0016209//antioxidant activity	GO:0008152//metabolic process;GO:0050896//response to stimulus;GO:0044699//single-organism process;GO:0044710//single-organism metabolic process;GO:0006950//response to stress
gene643	0	9	0.001	424.327	18.6948	0.000967817	0.0403928	yes	SEN_RS03075	lipoyl synthase [Salmonella enterica]	Metabolism	Global and Overview;Metabolism of cofactors and vitamins	ko01100//Metabolic pathways;ko00785//Lipoic acid metabolism	K03644	-	-	-
gene768	0.333333	13	50.0833	684.753	3.77318	0.000107836	0.0063869	yes	SEN_RS03680	LysR family transcriptional regulator [Salmonella enterica]	-	-	-	-	-	-	-
gene837	39.3333	19	8131.21	1834.61	-2.14799	7.46352e-11	1.67979e-08	yes	SEN_RS04015	DNA starvation/stationary phase protection protein [Salmonella enterica]	-	-	-	-	-	-	-
gene912	13.6667	5	932.883	165.873	-2.49161	5.51438e-05	0.00387845	yes	SEN_RS04365	hydroxylamine reductase [Salmonella enterica]	Metabolism	Energy metabolism	ko00910//Nitrogen metabolism	K05601	-	-	-
gene950	368.333	110.667	40964.5	5839	-2.81058	1.40101e-127	4.7298e-124	yes	SEN_RS04540	pathogenicity island 1 protein SopD2 [Salmonella enterica]	-	-	-	-	-	-	-
gene992	12.3333	4.66667	1283.71	191.197	-2.74719	1.78965e-05	0.00143854	yes	SEN_RS04735	secreted effector protein SseI [Salmonella enterica]	-	-	-	-	-	-	-
